# Supplementary material for: Bifunctional Hydrogen Bond Donor‐Catalyzed Diels–Alder Reactions: Origin of Stereoselectivity and Rate Enhancement
Source: PubMed Central journal article supplement (PMC8049058; doi:10.1002/chem.202004496), 2021-01-12
Supplement: CHEM-27-5180-s001.pdf [file CHEM-27-5180-s001.pdf]

# Chemistry–A European Journal

Supporting Information

## **Bifunctional Hydrogen Bond Donor-Catalyzed Diels–Alder Reactions: Origin of Stereoselectivity and Rate Enhancement**

Pascal Vermeeren,<sup>[a]</sup> Trevor A. Hamlin,<sup>\*[a]</sup> F. Matthias Bickelhaupt,<sup>\*[a, b]</sup> and Israel Fernández<sup>\*[c]</sup>

## Contents

**Figure S1.** Transition state structures for the uncatalyzed and hydrogen bond donor-catalyzed Diels–Alder reaction between **CP** and **A** forming an *endo* (left) or *exo* (right) cycloadduct, computed at M06-2X/def2-def2-SVPP.

**Figure S2.** Activation barriers ( $\Delta E^\ddagger$ ) for the uncatalyzed and HB-catalyzed Diels-Alder reactions versus the HOMO<sub>CP</sub>–LUMO<sub>HB–A</sub> energy gap ( $\Delta \epsilon_{H-L}$ ) of the reactants for the a) *endo* and b) *exo* pathway, computed at ZORA-M06-2X/TZ2P//M06-2X/def2-SVPP.

**Table S1.** Energy decomposition analyses (in kcal mol<sup>-1</sup>) of the interaction between **CP** and the HB at the transition states of the *endo* and *exo* pathway of the interaction between **CP** and **HB–A**.

**Figure S3.** a) Activation strain analyses and b) energy decomposition analyses of the catalyzed *endo* and *exo* Diels-Alder reactions between **CP** and **A**, where the energy values are projected onto the shorter newly forming C<sub>CP</sub>•••C<sub>β</sub> bond between **CP** and **A**, computed at ZORA-M06-2X/TZ2P//M06-2X/def2-SVPP.

**Figure S4.** a) Activation strain analyses and b) energy decomposition analyses of the catalyzed *endo* and *exo* Diels-Alder reactions between **CP** and **U–A**, where the energy values are projected onto the shorter newly forming C<sub>CP</sub>•••C<sub>β</sub> bond between **CP** and **U–A**, computed at ZORA-M06-2X/TZ2P//M06-2X/def2-SVPP.

**Figure S5.** a) Activation strain analyses and b) energy decomposition analyses of the catalyzed *endo* and *exo* Diels-Alder reactions between **CP** and **TU–A**, where the energy values are projected onto the shorter newly forming C<sub>CP</sub>•••C<sub>β</sub> bond between **CP** and **TU–A**, computed at ZORA-M06-2X/TZ2P//M06-2X/def2-SVPP.

**Figure S6.** a) Activation strain analyses and b) energy decomposition analyses of the catalyzed *endo* and *exo* Diels-Alder reactions between **CP** and **TUPh–A**, where the energy values are projected onto the shorter newly forming C<sub>CP</sub>•••C<sub>β</sub> bond between **CP** and **TUPh–A**, computed at ZORA-M06-2X/TZ2P//M06-2X/def2-SVPP.

**Figure S7.** Occupied-occupied orbital overlap between HOMO–6<sub>CP</sub> and HOMO–6<sub>UPh–A</sub> for the *endo* and *exo* Diels-Alder reactions between **CP** and **UPh–A** going from the reactants to the transition state, where the orbital overlap value is projected onto the shorter newly forming C<sub>CP</sub>•••C<sub>β</sub> bond between **CP** and the **UPh–A**, computed at ZORA-M06-2X/TZ2P//M06-2X/def2-SVPP.

**Table S2.** Occupied-occupied orbital overlap for the *endo* Diels-Alder reactions between **CP** and **UPh–A** in the transition state.

**Table S3.** Occupied-occupied orbital overlap for the *exo* Diels-Alder reactions between **CP** and **UPh–A** in the transition state.

**Figure S8.** a) Activation strain analyses and b) energy decomposition analyses of the *endo* Diels-Alder reactions between **CP** and **U–A** and **TU–A**, where the energy values are projected onto the shorter newly forming C<sub>CP</sub>•••C<sub>β</sub> bond between **CP** and **HB–A**, computed at ZORA-

M06-2X/TZ2P//M06-2X/def2-SVPP.

**Figure S9.** a) Activation strain analyses and b) energy decomposition analyses of the *endo* Diels-Alder reactions between **CP** and **UPh-A** and **TUPh-A**, where the energy values are projected onto the shorter newly forming  $C_{CP}\cdots C_{\beta}$  bond between **CP** and **HB-A**, computed at ZORA-M06-2X/TZ2P//M06-2X/def2-SVPP.

**Figure S10.** a) Activation strain analyses and b) energy decomposition analyses of the *endo* Diels-Alder reactions between **CP** and **UPh-A** and **TUPh-A**, where the energy values are projected onto the shorter newly forming  $C_{CP}\cdots C_{\beta}$  bond between **CP** and **HB-A**, computed at ZORA-M06-2X/TZ2P//M06-2X/def2-SVPP.

**Figure S11.** a) Activation strain analyses and b) energy decomposition analyses of the *endo* Diels-Alder reactions between **CP** and **A**, **U-A**, and **UPh-A**, where the energy values are projected onto the shorter newly forming  $C_{CP}\cdots C_{\beta}$  bond between **CP** and **HB-A**, computed at ZORA-M06-2X/TZ2P//M06-2X/def2-SVPP.

**Figure S12.** a) Activation strain analyses and b) energy decomposition analyses of the *endo* Diels-Alder reactions between **CP** and **A**, **TU-A**, and **TUPh-A**, where the energy values are projected onto the shorter newly forming  $C_{CP}\cdots C_{\beta}$  bond between **CP** and **HB-A**, computed at ZORA-M06-2X/TZ2P//M06-2X/def2-SVPP.

**Figure S13.** a) Activation strain analyses and b) energy decomposition analyses of the *exo* Diels-Alder reactions between **CP** and **A**, **TU-A**, and **TUPh-A**, where the energy values are projected onto the shorter newly forming  $C_{CP}\cdots C_{\beta}$  bond between **CP** and **HB-A**, computed at ZORA-M06-2X/TZ2P//M06-2X/def2-SVPP.

**Figure S14.** Key occupied orbitals (isovalue = 0.03 au) computed at the equilibrium structures of **A**, **U-A**, and **UPh-A**, where the MO coefficients of the carbon  $2p_z$  atomic orbitals, contributing to the occupied orbitals, are shown. Computed at the ZORA-M06-2X/TZ2P//M06-2X/def2-SVPP level.

**Table S2.** Cartesian coordinates (in Å), energies (in kcal mol<sup>-1</sup>), and number of imaginary frequencies of all stationary points, computed at M06-2X/def2-SVPP.

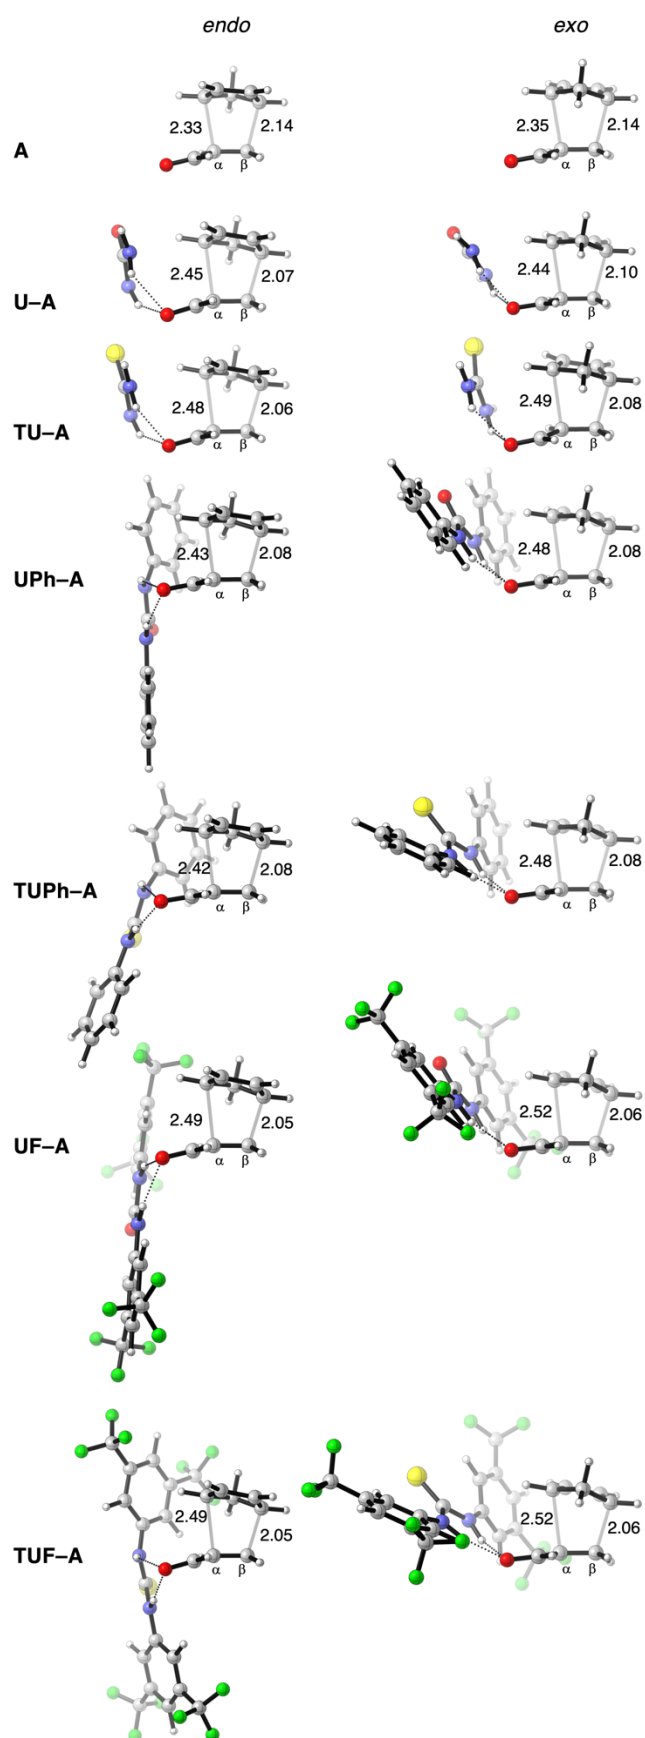

**Figure S1.** Transition state structures for the uncatalyzed and hydrogen bond donor-catalyzed Diels–Alder reaction between **CP** and **A** forming an *endo* (left) or *exo* (right) cycloadduct, computed at M06-2X/def2-def2-SVPP.

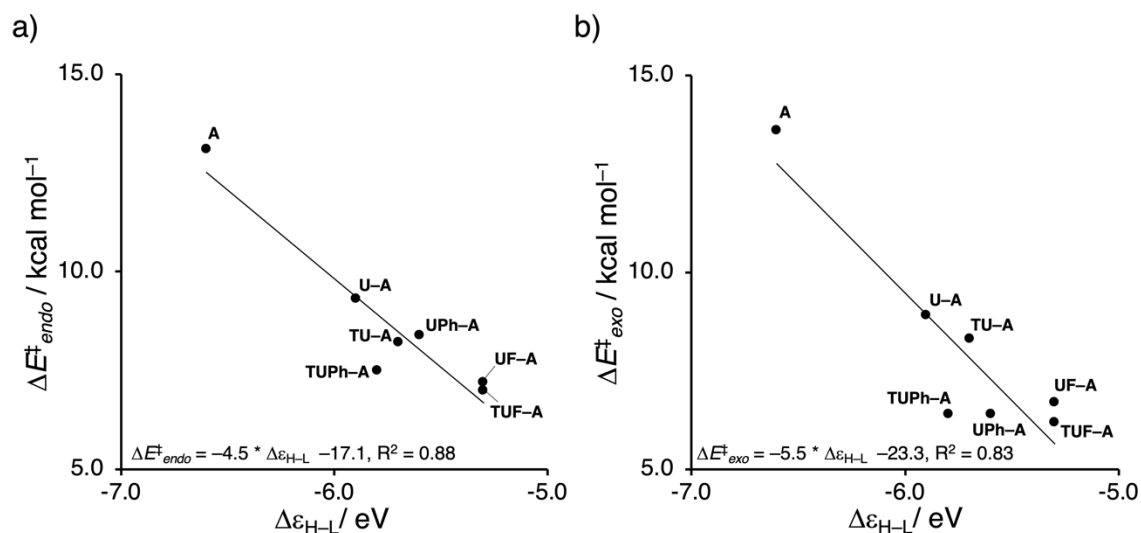

**Figure S2.** Activation barriers ( $\Delta E^{\ddagger}$ ) for the uncatalyzed and HB-catalyzed Diels-Alder reactions versus the HOMO<sub>CP</sub>-LUMO<sub>HB-A</sub> energy gap ( $\Delta \epsilon_{H-L}$ ) of the reactants for the a) *endo* and b) *exo* pathway, computed at ZORA-M06-2X/TZ2P//M06-2X/def2-SVPP.

**Table S1.** Energy decomposition analyses (in kcal mol<sup>-1</sup>) of the interaction between CP and the HB at the transition states structures of the *endo* and *exo* pathway for the hydrogen bond donor-catalyzed Diels-Alder reaction.

| HB          | cycloadduct | $\Delta E_{int}$ | $\Delta V_{elstat}$ | $\Delta E_{Pauli}$ | $\Delta E_{oi}$ |
|-------------|-------------|------------------|---------------------|--------------------|-----------------|
| <b>U</b>    | <i>endo</i> | -1.4             | -2.7                | 2.5                | -1.2            |
|             | <i>exo</i>  | -1.1             | -2.9                | 3.0                | -1.2            |
| <b>TU</b>   | <i>endo</i> | -2.2             | -3.2                | 2.7                | -1.7            |
|             | <i>exo</i>  | -2.4             | -3.9                | 3.2                | -1.8            |
| <b>UPh</b>  | <i>endo</i> | -2.7             | -2.7                | 1.3                | -1.3            |
|             | <i>exo</i>  | -3.3             | -3.5                | 2.1                | -1.8            |
| <b>TUPh</b> | <i>endo</i> | -3.1             | -3.0                | 1.6                | -1.6            |
|             | <i>exo</i>  | -3.5             | -3.7                | 2.2                | -1.9            |
| <b>UF</b>   | <i>endo</i> | -2.1             | -2.3                | 1.3                | -1.1            |
|             | <i>exo</i>  | -3.6             | -3.0                | 1.4                | -2.0            |
| <b>TUF</b>  | <i>endo</i> | -3.7             | -3.9                | 2.3                | -2.0            |
|             | <i>exo</i>  | -3.7             | -3.0                | 1.4                | -2.0            |

[a] Computed at ZORA-M06-2X/TZ2P//M06-2X/def2-SVPP

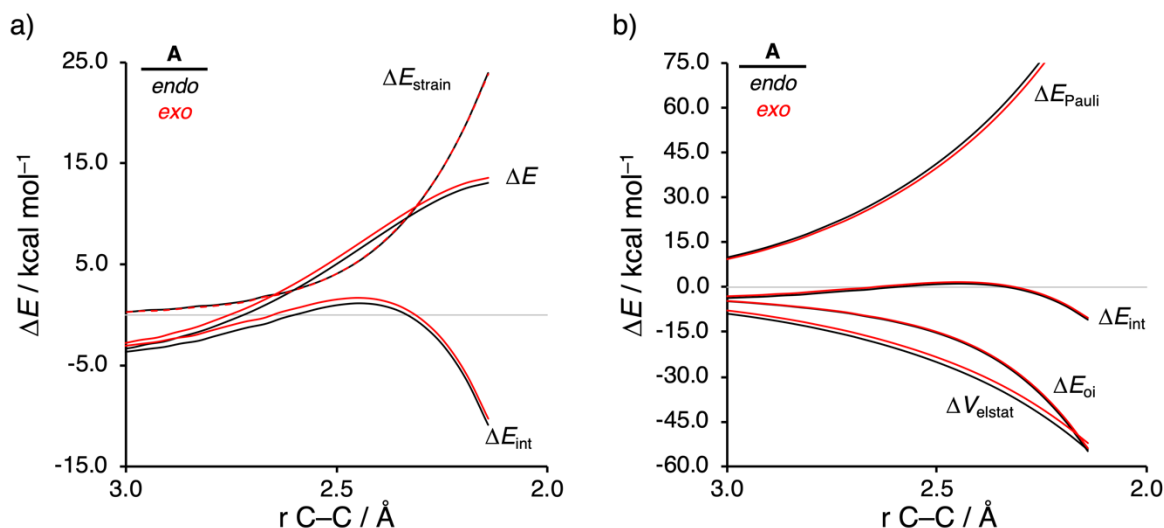

**Figure S3.** a) Activation strain analyses and b) energy decomposition analyses of the catalyzed *endo* and *exo* Diels-Alder reactions between **CP** and **A**, where the energy values are projected onto the shorter newly forming  $C_{CP}\cdots C_{\beta}$  bond between **CP** and **A**, computed at ZORA-M06-2X/TZ2P//M06-2X/def2-SVPP.

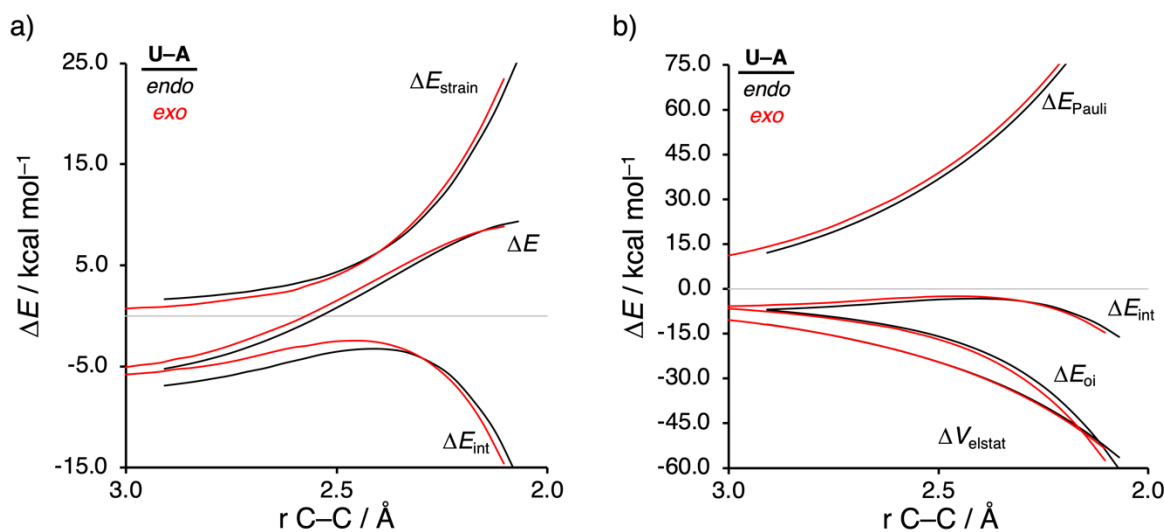

**Figure S4.** a) Activation strain analyses and b) energy decomposition analyses of the catalyzed *endo* and *exo* Diels-Alder reactions between **CP** and **U-A**, where the energy values are projected onto the shorter newly forming  $C_{CP}\cdots C_{\beta}$  bond between **CP** and **U-A**, computed at ZORA-M06-2X/TZ2P//M06-2X/def2-SVPP.

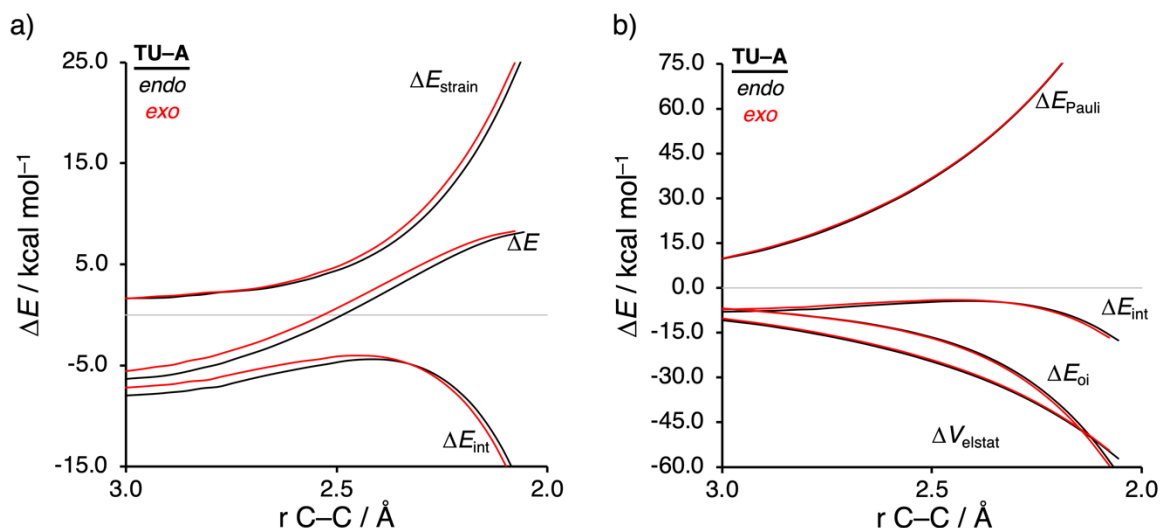

**Figure S5.** a) Activation strain analyses and b) energy decomposition analyses of the catalyzed *endo* and *exo* Diels-Alder reactions between CP and TU-A, where the energy values are projected onto the shorter newly forming  $C_{CP}\cdots C_{\beta}$  bond between CP and TU-A, computed at ZORA-M06-2X/TZ2P//M06-2X/def2-SVPP.

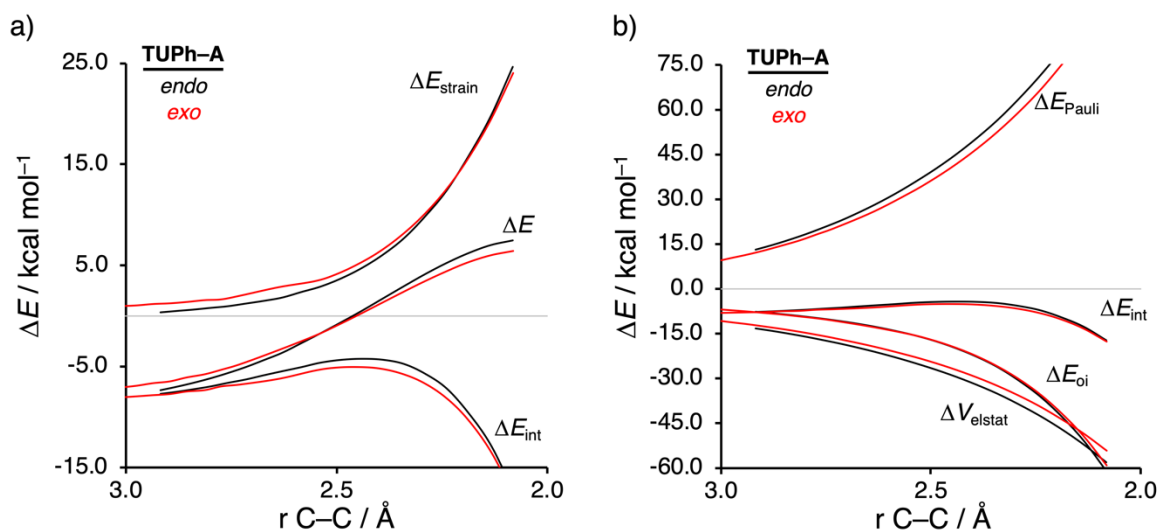

**Figure S6.** a) Activation strain analyses and b) energy decomposition analyses of the catalyzed *endo* and *exo* Diels-Alder reactions between CP and TUPh-A, where the energy values are projected onto the shorter newly forming  $C_{CP}\cdots C_{\beta}$  bond between CP and TUPh-A, computed at ZORA-M06-2X/TZ2P//M06-2X/def2-SVPP.

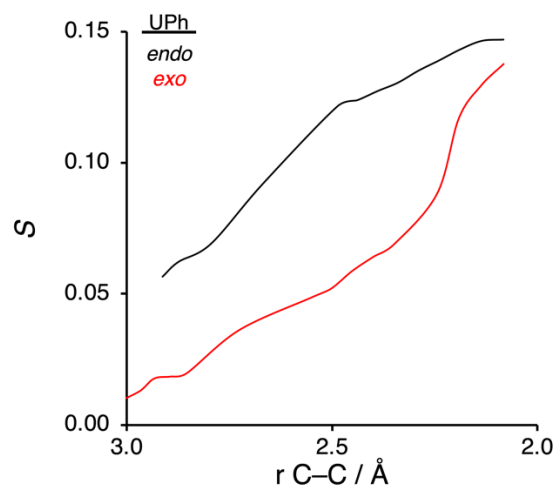

**Figure S7.** Occupied-occupied orbital overlap between HOMO-6<sub>CP</sub> and HOMO-6<sub>UPh-A</sub> for the *endo* and *exo* Diels-Alder reactions between **CP** and **UPh-A** going from the reactants to the transition state, where the orbital overlap value is projected onto the shorter newly forming C<sub>CP</sub>•••C<sub>β</sub> bond between **CP** and the **UPh-A**, computed at ZORA-M06-2X/TZ2P//M06-2X/def2-SVPP.



**Table S2.** Occupied-occupied orbital overlap for the *endo* Diels-Alder reactions between **CP** and **UPh-A** in the transition state.<sup>[a]</sup>

|           |        | UPh-A |        |        |        |        |        |        |        |        |        |         |
|-----------|--------|-------|--------|--------|--------|--------|--------|--------|--------|--------|--------|---------|
|           |        | HOMO  | HOMO-1 | HOMO-2 | HOMO-3 | HOMO-4 | HOMO-5 | HOMO-6 | HOMO-7 | HOMO-8 | HOMO-9 | HOMO-10 |
| <b>CP</b> | HOMO   | 0.01  | 0.01   | 0.00   | 0.00   | 0.01   | 0.00   | 0.05   | 0.01   | 0.00   | 0.00   | 0.00    |
|           | HOMO-1 | 0.01  | 0.01   | 0.00   | 0.01   | 0.01   | 0.03   | 0.10   | 0.03   | 0.01   | 0.01   | 0.00    |
|           | HOMO-2 | 0.00  | 0.00   | 0.00   | 0.00   | 0.00   | 0.00   | 0.01   | 0.00   | 0.00   | 0.00   | 0.01    |
|           | HOMO-3 | 0.00  | 0.00   | 0.00   | 0.01   | 0.00   | 0.02   | 0.00   | 0.00   | 0.02   | 0.00   | 0.01    |
|           | HOMO-4 | 0.01  | 0.01   | 0.00   | 0.02   | 0.00   | 0.00   | 0.02   | 0.01   | 0.01   | 0.00   | 0.00    |
|           | HOMO-5 | 0.01  | 0.01   | 0.00   | 0.03   | 0.00   | 0.01   | 0.01   | 0.01   | 0.00   | 0.00   | 0.01    |
|           | HOMO-6 | 0.01  | 0.01   | 0.00   | 0.01   | 0.01   | 0.04   | 0.15   | 0.04   | 0.00   | 0.01   | 0.00    |
|           | HOMO-7 | 0.01  | 0.01   | 0.00   | 0.02   | 0.00   | 0.00   | 0.03   | 0.01   | 0.01   | 0.00   | 0.00    |
|           | HOMO-8 | 0.01  | 0.01   | 0.00   | 0.03   | 0.00   | 0.00   | 0.00   | 0.00   | 0.01   | 0.00   | 0.00    |
|           | HOMO-9 | 0.00  | 0.00   | 0.00   | 0.02   | 0.01   | 0.03   | 0.05   | 0.00   | 0.01   | 0.00   | 0.00    |
| HOMO-10   | 0.01   | 0.01  | 0.00   | 0.02   | 0.00   | 0.01   | 0.04   | 0.01   | 0.01   | 0.00   | 0.00   |         |

[a] Computed at ZORA-M06-2X/TZ2P//M06-2X/def2-SVPP

**Table S3.** Occupied-occupied orbital overlap for the *exo* Diels-Alder reactions between **CP** and **UPh-A** in the transition state.<sup>[a]</sup>

|           |        | UPh-A |        |        |        |        |        |        |        |        |        |         |
|-----------|--------|-------|--------|--------|--------|--------|--------|--------|--------|--------|--------|---------|
|           |        | HOMO  | HOMO-1 | HOMO-2 | HOMO-3 | HOMO-4 | HOMO-5 | HOMO-6 | HOMO-7 | HOMO-8 | HOMO-9 | HOMO-10 |
| <b>CP</b> | HOMO   | 0.00  | 0.00   | 0.00   | 0.03   | 0.00   | 0.00   | 0.05   | 0.00   | 0.01   | 0.00   | 0.00    |
|           | HOMO-1 | 0.00  | 0.00   | 0.00   | 0.02   | 0.00   | 0.02   | 0.10   | 0.00   | 0.03   | 0.01   | 0.00    |
|           | HOMO-2 | 0.00  | 0.00   | 0.00   | 0.00   | 0.00   | 0.02   | 0.01   | 0.02   | 0.01   | 0.00   | 0.00    |
|           | HOMO-3 | 0.00  | 0.00   | 0.00   | 0.00   | 0.00   | 0.01   | 0.02   | 0.01   | 0.02   | 0.00   | 0.01    |
|           | HOMO-4 | 0.01  | 0.01   | 0.00   | 0.00   | 0.00   | 0.01   | 0.02   | 0.02   | 0.00   | 0.00   | 0.00    |
|           | HOMO-5 | 0.00  | 0.00   | 0.00   | 0.01   | 0.00   | 0.00   | 0.01   | 0.00   | 0.01   | 0.00   | 0.00    |
|           | HOMO-6 | 0.00  | 0.01   | 0.00   | 0.00   | 0.00   | 0.02   | 0.14   | 0.01   | 0.00   | 0.01   | 0.00    |
|           | HOMO-7 | 0.01  | 0.00   | 0.00   | 0.01   | 0.00   | 0.01   | 0.02   | 0.00   | 0.01   | 0.00   | 0.00    |
|           | HOMO-8 | 0.01  | 0.01   | 0.00   | 0.00   | 0.00   | 0.01   | 0.01   | 0.02   | 0.00   | 0.00   | 0.00    |
|           | HOMO-9 | 0.00  | 0.00   | 0.00   | 0.01   | 0.00   | 0.02   | 0.05   | 0.02   | 0.01   | 0.00   | 0.00    |
| HOMO-10   | 0.01   | 0.01  | 0.00   | 0.00   | 0.00   | 0.00   | 0.04   | 0.01   | 0.01   | 0.00   | 0.00   |         |

[a] Computed at ZORA-M06-2X/TZ2P//M06-2X/def2-SVPP

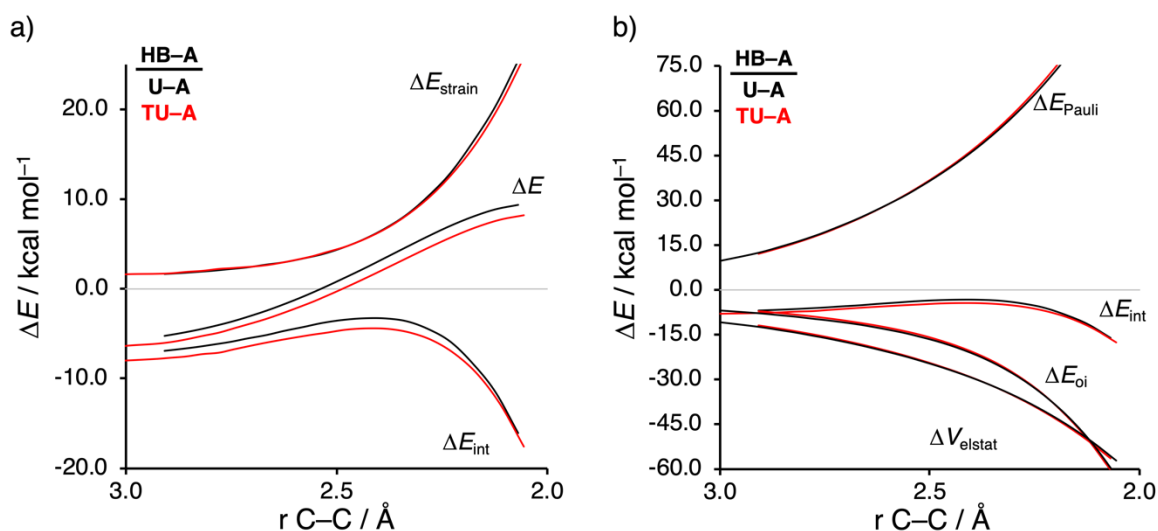

**Figure S8.** a) Activation strain analyses and b) energy decomposition analyses of the *endo* Diels-Alder reactions between CP and U-A and TU-A, where the energy values are projected onto the shorter newly forming  $C_{CP}\cdots C_{\beta}$  bond between CP and HB-A, computed at ZORA-M06-2X/TZ2P//M06-2X/def2-SVPP.

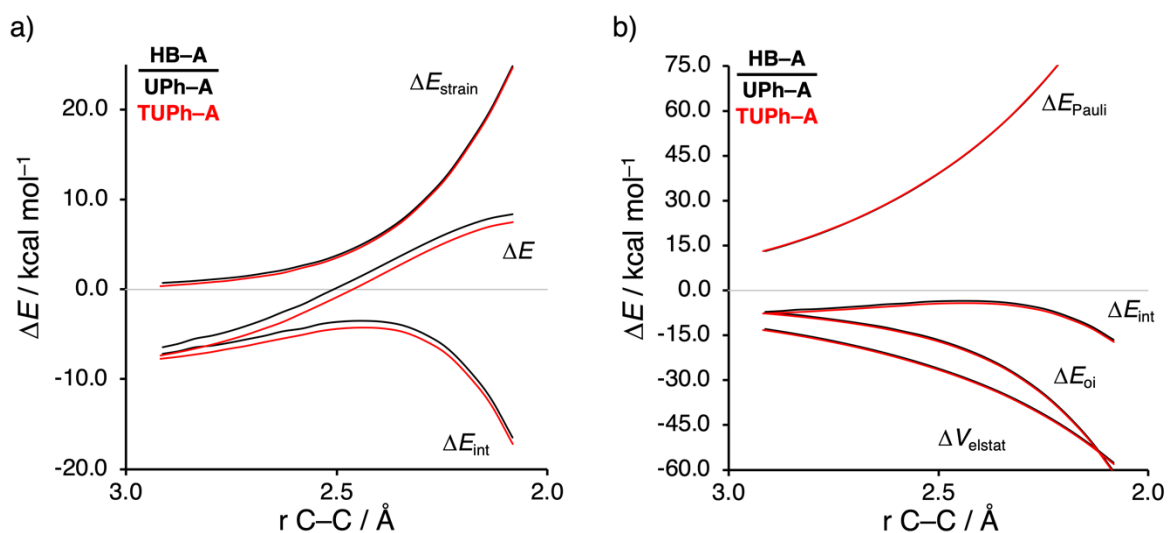

**Figure S9.** a) Activation strain analyses and b) energy decomposition analyses of the *endo* Diels-Alder reactions between CP and UPh-A and TUPh-A, where the energy values are projected onto the shorter newly forming  $C_{CP}\cdots C_{\beta}$  bond between CP and HB-A, computed at ZORA-M06-2X/TZ2P//M06-2X/def2-SVPP.

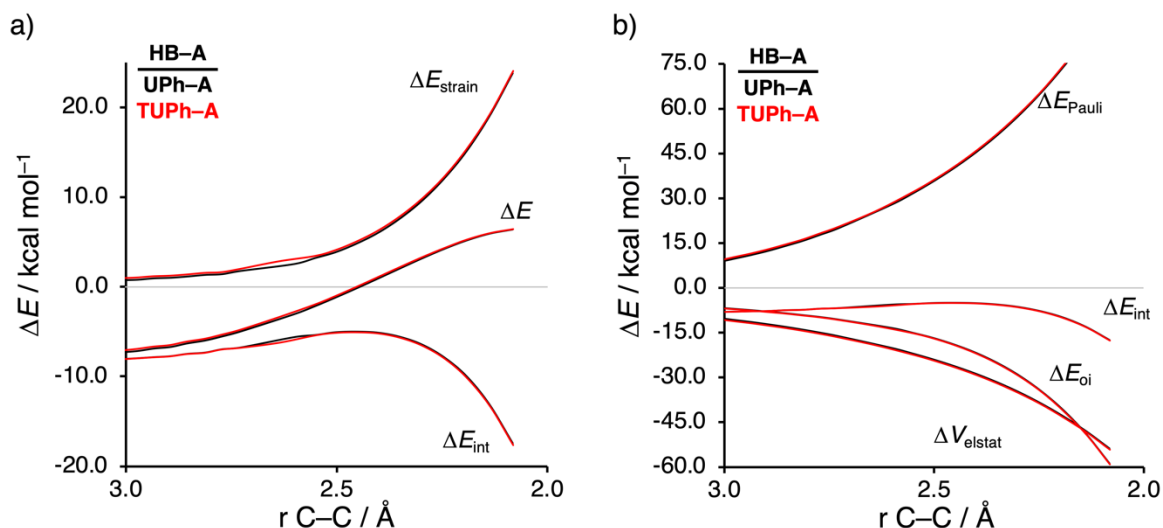

**Figure S10.** a) Activation strain analyses and b) energy decomposition analyses of the *endo* Diels-Alder reactions between CP and UPh-A and TUPh-A, where the energy values are projected onto the shorter newly forming  $C_{CP}\cdots C_{\beta}$  bond between CP and HB-A, computed at ZORA-M06-2X/TZ2P//M06-2X/def2-SVPP.

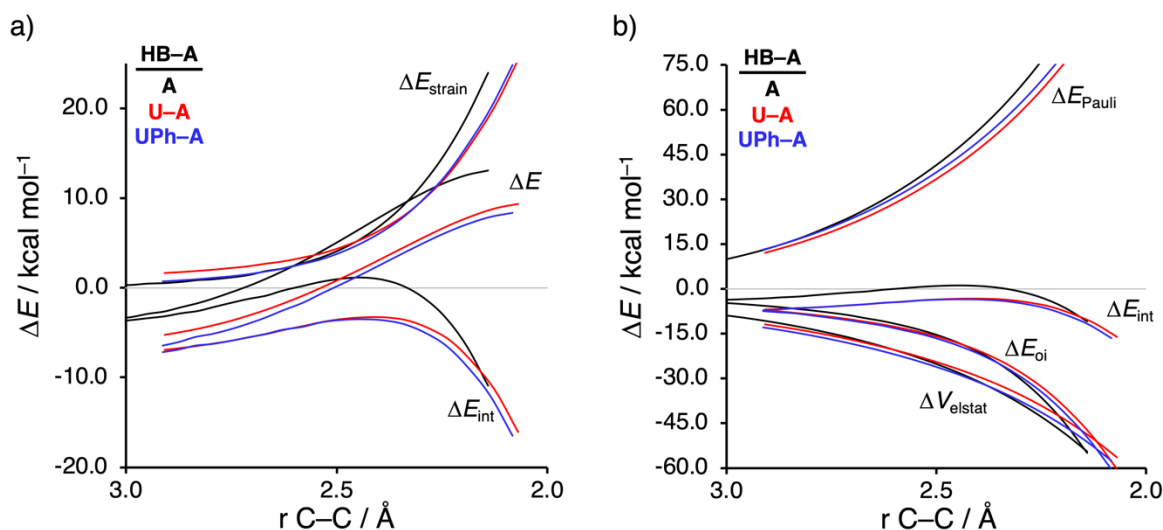

**Figure S11.** a) Activation strain analyses and b) energy decomposition analyses of the *endo* Diels-Alder reactions between CP and A, U-A, and UPh-A, where the energy values are projected onto the shorter newly forming  $C_{CP}\cdots C_{\beta}$  bond between CP and HB-A, computed at ZORA-M06-2X/TZ2P//M06-2X/def2-SVPP.

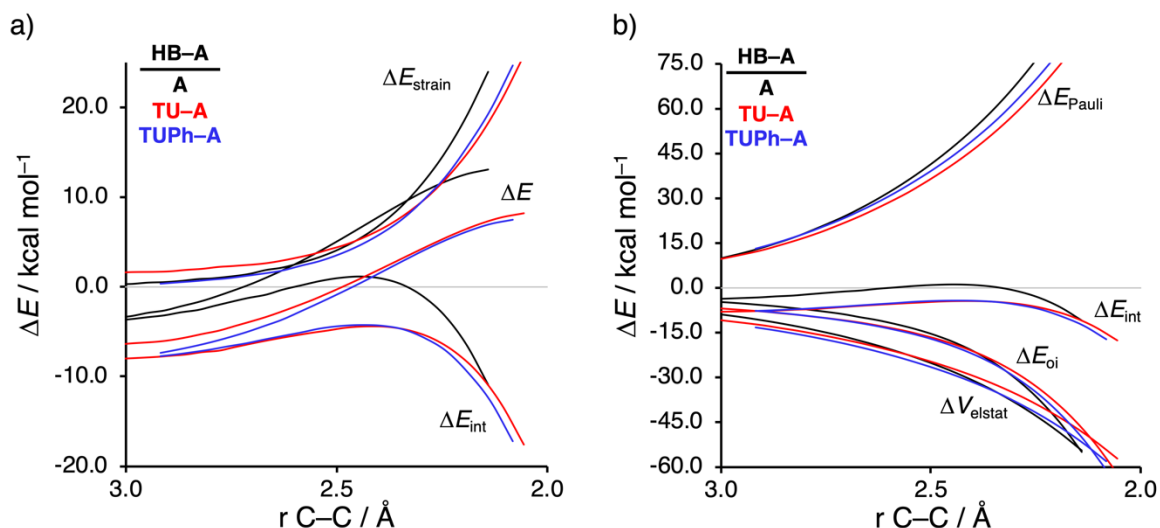

**Figure S12.** a) Activation strain analyses and b) energy decomposition analyses of the *endo* Diels-Alder reactions between **CP** and **A**, **TU-A**, and **TUPh-A**, where the energy values are projected onto the shorter newly forming  $\text{C}_{\text{CP}} \cdots \text{C}_{\beta}$  bond between **CP** and **HB-A**, computed at ZORA-M06-2X/TZ2P//M06-2X/def2-SVPP.

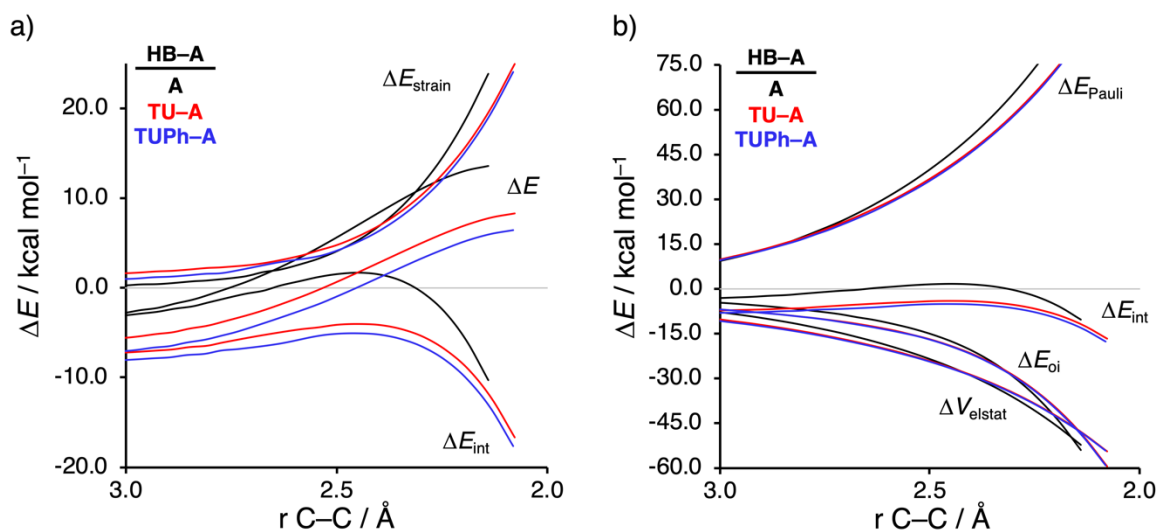

**Figure S13.** a) Activation strain analyses and b) energy decomposition analyses of the *exo* Diels-Alder reactions between **CP** and **A**, **TU-A**, and **TUPh-A**, where the energy values are projected onto the shorter newly forming  $\text{C}_{\text{CP}} \cdots \text{C}_{\beta}$  bond between **CP** and **HB-A**, computed at ZORA-M06-2X/TZ2P//M06-2X/def2-SVPP.

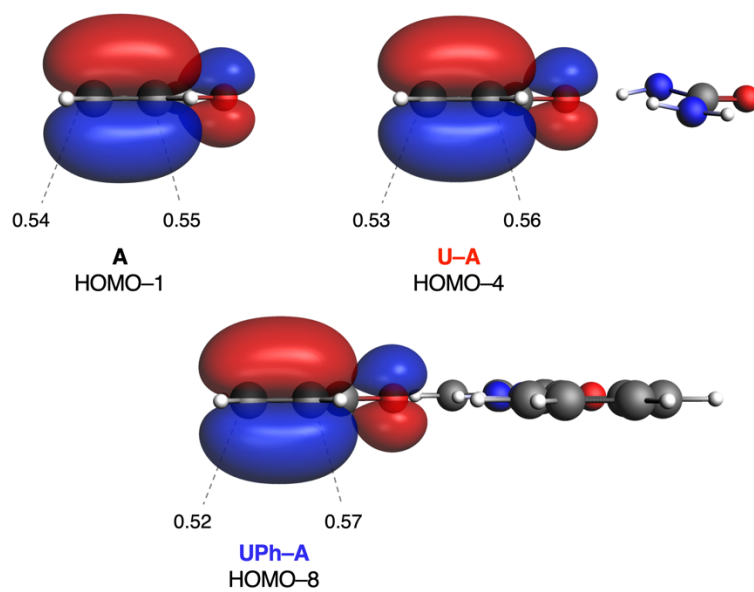

**Figure S14.** Key occupied orbitals (isovalue = 0.03 au) computed at the equilibrium structures of **A**, **U-A**, and **UPh-A**, where the MO coefficients of the carbon  $2p_z$  atomic orbitals, contributing to the occupied orbitals, are shown. Computed at the ZORA-M06-2X/TZ2P//M06-2X/def2-SVPP level.

**Table S4.** Cartesian coordinates (in Å), energies (in Hartree), and number of imaginary frequencies of all stationary points, computed at M06-2X/def2-SVPP.

**cyclopentadiene (CP)**

**E** = -193.757376

**H** = -193.752288

**G** = -193.783979

**N<sub>imag</sub>** = 0

|   |          |          |          |
|---|----------|----------|----------|
| C | 1.17779  | 0.28251  | 0.00000  |
| C | 0.73558  | -0.99032 | -0.00000 |
| C | -0.73557 | -0.99032 | -0.00000 |
| C | -1.17779 | 0.28250  | 0.00000  |
| C | -0.00000 | 1.21499  | 0.00000  |
| H | 2.21842  | 0.61047  | 0.00000  |
| H | 1.35660  | -1.88803 | -0.00000 |
| H | -1.35659 | -1.88804 | -0.00000 |
| H | -2.21842 | 0.61047  | 0.00000  |
| H | -0.00000 | 1.87948  | -0.88521 |
| H | -0.00000 | 1.87948  | 0.88521  |

**Acrolein (A)**

**E** = -191.606101

**H** = -191.60080

**G** = -191.632382

**N<sub>imag</sub>** = 0

|   |          |          |          |
|---|----------|----------|----------|
| O | 1.78657  | -0.12203 | 0.00002  |
| C | 0.68162  | 0.34839  | -0.00017 |
| H | 0.52268  | 1.45788  | 0.00023  |
| C | -0.56388 | -0.45242 | -0.00004 |
| C | -1.75805 | 0.14461  | 0.00010  |
| H | -0.44503 | -1.54099 | -0.00008 |
| H | -2.69320 | -0.42352 | 0.00018  |
| H | -1.83515 | 1.23938  | 0.00014  |

**Acrolein + Urea (U-A)**

**E** = -416.538391

**H** = -416.526644

**G** = -416.577863

**N<sub>imag</sub>** = 0

|   |          |          |          |
|---|----------|----------|----------|
| O | -0.89256 | 0.39083  | -0.06114 |
| C | -2.08490 | 0.57332  | -0.09185 |
| H | -2.49728 | 1.59630  | -0.26567 |
| C | -3.09062 | -0.48904 | 0.08894  |
| C | -4.39410 | -0.19840 | 0.03941  |
| H | -2.71636 | -1.50313 | 0.26109  |
| H | -5.16404 | -0.96461 | 0.16926  |
| H | -4.73346 | 0.83006  | -0.13540 |
| H | 1.06611  | 1.26981  | -0.09567 |
| H | 0.75135  | -0.98067 | 0.04750  |
| N | 1.73896  | -1.12761 | -0.13099 |
| C | 2.63730  | -0.09522 | 0.01045  |

|   |         |          |          |
|---|---------|----------|----------|
| H | 2.12530 | -2.05750 | -0.03242 |
| N | 2.04906 | 1.14291  | 0.12085  |
| H | 2.67692 | 1.93271  | 0.04571  |
| O | 3.83871 | -0.26258 | 0.03550  |

**Acrolein + 1,3-diphenylurea (UPh-A)**

**E** = -877.943360

**H** = -877.923144

**G** = -877.996.417

**N<sub>imag</sub>** = 0

|   |          |          |          |
|---|----------|----------|----------|
| O | 0.24256  | 2.41639  | 0.00045  |
| C | 0.38533  | 3.61675  | -0.00017 |
| H | -0.50506 | 4.28855  | -0.00112 |
| C | 1.69161  | 4.29393  | 0.00027  |
| C | 1.75451  | 5.62937  | -0.00037 |
| H | 2.58368  | 3.65954  | 0.00118  |
| H | 2.70914  | 6.16354  | -0.00003 |
| H | 0.83994  | 6.23505  | -0.00128 |
| H | -1.02094 | 0.79968  | -0.00042 |
| H | 0.98751  | 0.50314  | 0.00118  |
| N | 0.96579  | -0.51305 | 0.00084  |
| C | -0.27864 | -1.11705 | -0.00031 |
| N | -1.29461 | -0.17945 | -0.00081 |
| O | -0.45478 | -2.31561 | -0.00087 |
| C | 2.21888  | -1.13545 | 0.00043  |
| C | 2.41080  | -2.52627 | 0.00116  |
| C | 3.34549  | -0.29519 | -0.00054 |
| C | 3.70723  | -3.03978 | 0.00087  |
| C | 4.63123  | -0.82365 | -0.00080 |
| C | 4.82372  | -2.20526 | -0.00011 |
| H | 1.54825  | -3.18781 | 0.00195  |
| H | 3.19900  | 0.78972  | -0.00115 |
| H | 3.84017  | -4.12482 | 0.00145  |
| H | 5.48985  | -0.14727 | -0.00156 |
| H | 5.83185  | -2.62506 | -0.00029 |
| C | -2.67463 | -0.41225 | -0.00039 |
| C | -3.50962 | 0.71824  | 0.00064  |
| C | -3.26032 | -1.68818 | -0.00105 |
| C | -4.89328 | 0.58361  | 0.00101  |
| C | -4.64978 | -1.80510 | -0.00061 |
| C | -5.47711 | -0.68329 | 0.00041  |
| H | -3.05677 | 1.71479  | 0.00121  |
| H | -2.62605 | -2.57090 | -0.00191 |
| H | -5.51936 | 1.47956  | 0.00180  |
| H | -5.09082 | -2.80536 | -0.00112 |
| H | -6.56356 | -0.79370 | 0.00071  |

**Acrolein + 1,3-bis(3,5-bis(trifluoromethyl)phenyl)urea (UF-A)****E** = -2224.693060**H** = -2224.685437**G** = -2224.769955**N<sub>imag</sub>** = 0

|   |          |          |          |
|---|----------|----------|----------|
| O | 0.17154  | 3.12409  | -0.01228 |
| C | 0.36437  | 4.31114  | -0.15950 |
| H | -0.49910 | 5.01517  | -0.18834 |
| C | 1.69012  | 4.92676  | -0.30968 |
| C | 1.79385  | 6.25196  | -0.46003 |
| H | 2.56608  | 4.26978  | -0.29573 |
| H | 2.76357  | 6.74500  | -0.57494 |
| H | 0.90102  | 6.88908  | -0.47243 |
| H | -1.05293 | 1.44027  | 0.06882  |
| H | 0.96855  | 1.34129  | 0.07791  |
| N | 1.04841  | 0.32615  | 0.06554  |
| C | -0.12763 | -0.39942 | 0.04717  |
| N | -1.23017 | 0.43785  | 0.05911  |
| O | -0.18496 | -1.60720 | 0.02475  |
| C | 2.34979  | -0.16697 | 0.04985  |
| C | 2.68604  | -1.52901 | -0.03243 |
| C | 3.37892  | 0.78211  | 0.10968  |
| C | 4.02867  | -1.89331 | -0.06036 |
| C | 4.71163  | 0.39109  | 0.07960  |
| C | 5.05764  | -0.95308 | -0.01078 |
| H | 1.90333  | -2.28298 | -0.07980 |
| H | 3.12590  | 1.84293  | 0.17591  |
| H | 6.10394  | -1.26306 | -0.04886 |
| C | -2.57272 | 0.06201  | 0.04405  |
| C | -3.52309 | 1.09838  | 0.03469  |
| C | -3.02020 | -1.26541 | 0.03866  |
| C | -4.87952 | 0.81243  | 0.02001  |
| C | -4.39181 | -1.52369 | 0.01905  |
| C | -5.33676 | -0.50609 | 0.00872  |
| H | -3.19015 | 2.13921  | 0.03506  |
| H | -2.30286 | -2.08419 | 0.04837  |
| H | -6.40419 | -0.73075 | -0.00967 |
| C | 5.78202  | 1.44410  | 0.19495  |
| F | 5.37840  | 2.61117  | -0.32361 |
| F | 6.10321  | 1.67910  | 1.46837  |
| F | 6.89795  | 1.08554  | -0.43507 |
| C | 4.41115  | -3.35086 | -0.13833 |
| F | 5.25525  | -3.57092 | -1.14915 |
| F | 5.03214  | -3.74349 | 0.97629  |
| F | 3.35561  | -4.14054 | -0.31161 |
| C | -4.82731 | -2.96761 | -0.01689 |
| F | -6.14811 | -3.09060 | 0.11730  |
| F | -4.48607 | -3.54638 | -1.16908 |
| F | -4.25353 | -3.67111 | 0.95891  |
| C | -5.88656 | 1.93211  | 0.05787  |
| F | -5.33872 | 3.10520  | -0.26954 |



|   |          |         |          |
|---|----------|---------|----------|
| F | -6.89572 | 1.70718 | -0.78304 |
| F | -6.41543 | 2.06991 | 1.27509  |

**Acrolein + Thioruea (TU-A)**

**E** = -739.441708

**H** = -739.429644

**G** = -739.481619

**N<sub>imag</sub>** = 0

|   |          |          |          |
|---|----------|----------|----------|
| O | -1.42544 | 0.42971  | -0.00186 |
| C | -2.62416 | 0.57790  | -0.00013 |
| H | -3.06616 | 1.60261  | 0.00238  |
| C | -3.59504 | -0.52945 | -0.00100 |
| C | -4.90704 | -0.27382 | 0.00131  |
| H | -3.19049 | -1.54650 | -0.00354 |
| H | -5.65278 | -1.07420 | 0.00078  |
| H | -5.27819 | 0.75845  | 0.00388  |
| H | 0.48485  | 1.33653  | 0.00085  |
| H | 0.19843  | -0.90372 | -0.00100 |
| N | 1.20474  | -1.04489 | 0.00117  |
| C | 2.06907  | -0.00479 | 0.00037  |
| H | 1.60153  | -1.97472 | -0.00035 |
| N | 1.49439  | 1.21904  | 0.00003  |
| H | 2.11170  | 2.01974  | 0.00001  |
| S | 3.72773  | -0.21837 | 0.00001  |

**Acrolein + 1,3-diphenylthiourea (TUPh-A)**

**E** = -1200.835995

**H** = -1200.815480

**G** = -1200.889366

**N<sub>imag</sub>** = 0

|   |          |          |          |
|---|----------|----------|----------|
| O | 0.18236  | 2.57663  | 0.77899  |
| C | 0.87430  | 3.28903  | 0.08679  |
| H | 0.54819  | 4.33202  | -0.13970 |
| C | 2.15905  | 2.88561  | -0.50741 |
| C | 2.84921  | 3.75699  | -1.25101 |
| H | 2.51383  | 1.86487  | -0.32169 |
| H | 3.80538  | 3.49047  | -1.71069 |
| H | 2.47219  | 4.77256  | -1.42437 |
| H | -1.10303 | 0.96237  | 0.65760  |
| H | 0.77561  | 0.58920  | 0.90162  |
| N | 0.81989  | -0.30210 | 0.40914  |
| C | -0.39529 | -0.84427 | 0.06827  |
| N | -1.40361 | 0.03130  | 0.37330  |
| S | -0.60114 | -2.34687 | -0.61009 |
| C | 2.12545  | -0.80863 | 0.28165  |
| C | 2.54815  | -1.65445 | -0.75298 |
| C | 3.06591  | -0.36108 | 1.22387  |
| C | 3.88375  | -2.04846 | -0.81728 |
| C | 4.39936  | -0.75064 | 1.14027  |
| C | 4.81631  | -1.60515 | 0.12007  |
| H | 1.83152  | -1.99806 | -1.49525 |

|   |          |          |          |
|---|----------|----------|----------|
| H | 2.73597  | 0.29266  | 2.03742  |
| H | 4.19842  | -2.71212 | -1.62655 |
| H | 5.11204  | -0.39285 | 1.88741  |
| H | 5.85930  | -1.92285 | 0.05645  |
| C | -2.79681 | -0.06157 | 0.19023  |
| C | -3.48401 | 1.15217  | 0.03121  |
| C | -3.52340 | -1.25876 | 0.21533  |
| C | -4.86707 | 1.17308  | -0.11163 |
| C | -4.90879 | -1.22457 | 0.06069  |
| C | -5.58990 | -0.01990 | -0.10577 |
| H | -2.91631 | 2.08774  | 0.02041  |
| H | -3.00529 | -2.20423 | 0.35493  |
| H | -5.38074 | 2.12976  | -0.23424 |
| H | -5.46343 | -2.16604 | 0.07984  |
| H | -6.67556 | -0.00943 | -0.22462 |

**Acrolein + 1,3-bis(3,5-bis(trifluoromethyl)phenyl)thiourea  
(TUF-A)**

**E** = -2547.583708

**H** = -2547.548708

**G** = -2547.661712

**N<sub>imag</sub>** = 0

|   |          |          |          |
|---|----------|----------|----------|
| O | 0.20219  | 2.90405  | 0.01650  |
| C | 0.51667  | 4.05735  | -0.18509 |
| H | -0.27352 | 4.82978  | -0.32918 |
| C | 1.90103  | 4.54283  | -0.25849 |
| C | 2.13665  | 5.84221  | -0.47351 |
| H | 2.71117  | 3.81645  | -0.13455 |
| H | 3.15396  | 6.23995  | -0.53345 |
| H | 1.31003  | 6.55269  | -0.59668 |
| H | -0.99808 | 1.21075  | 0.06492  |
| H | 0.90147  | 1.10672  | 0.17248  |
| N | 1.01627  | 0.09644  | 0.08370  |
| C | -0.14541 | -0.63439 | 0.08368  |
| N | -1.22333 | 0.21762  | 0.12343  |
| S | -0.22607 | -2.28872 | 0.04561  |
| C | 2.35961  | -0.28582 | 0.04919  |
| C | 2.85609  | -1.49825 | -0.45267 |
| C | 3.27188  | 0.67818  | 0.50108  |
| C | 4.23263  | -1.71022 | -0.48462 |
| C | 4.64126  | 0.45386  | 0.43644  |
| C | 5.14357  | -0.74703 | -0.05445 |
| H | 2.17371  | -2.25915 | -0.82530 |
| H | 2.89514  | 1.62110  | 0.90832  |
| H | 6.21820  | -0.92466 | -0.11221 |
| C | -2.60163 | -0.02612 | 0.10241  |
| C | -3.40711 | 1.06111  | -0.28363 |
| C | -3.22106 | -1.22531 | 0.46957  |
| C | -4.78744 | 0.94585  | -0.31024 |
| C | -4.61370 | -1.32063 | 0.41964  |
| C | -5.41331 | -0.25382 | 0.03347  |

|   |          |          |          |
|---|----------|----------|----------|
| H | -2.93881 | 2.00674  | -0.56786 |
| H | -2.62666 | -2.07606 | 0.79552  |
| H | -6.50035 | -0.34792 | 0.00600  |
| C | 5.55869  | 1.53928  | 0.93253  |
| F | 5.20241  | 2.73360  | 0.43378  |
| F | 5.51178  | 1.65444  | 2.25999  |
| F | 6.82414  | 1.32249  | 0.58923  |
| C | 4.74740  | -3.04013 | -0.97915 |
| F | 5.96998  | -2.92491 | -1.50100 |
| F | 4.82465  | -3.92723 | 0.01329  |
| F | 3.95299  | -3.55850 | -1.91362 |
| C | -5.24010 | -2.64516 | 0.77972  |
| F | -6.55307 | -2.53050 | 0.98263  |
| F | -5.06280 | -3.54355 | -0.18895 |
| F | -4.70020 | -3.15131 | 1.88832  |
| C | -5.64458 | 2.12341  | -0.69449 |
| F | -4.91504 | 3.14496  | -1.14893 |
| F | -6.51968 | 1.79656  | -1.64501 |
| F | -6.34896 | 2.56943  | 0.34716  |

**TS: endo\_CP + A**

**E** = -385.343710

**H** = -385.334897

**G** = -385.376146

**N<sub>imag</sub>** = 1, -465.2270i cm<sup>-1</sup>

|   |          |          |          |
|---|----------|----------|----------|
| C | -0.93989 | 0.85934  | 0.31751  |
| C | -0.02044 | 1.62617  | -0.38808 |
| H | 0.40658  | 2.52090  | 0.07372  |
| C | -1.93786 | 0.04076  | -0.38664 |
| O | -2.92096 | -0.44529 | 0.11168  |
| H | -1.70530 | -0.11704 | -1.47432 |
| H | -1.15302 | 1.05641  | 1.37226  |
| H | -0.08099 | 1.65468  | -1.48033 |
| C | 0.41253  | -0.96327 | 0.84893  |
| C | 0.67006  | -1.43195 | -0.43610 |
| C | 1.53831  | -0.53232 | -1.07979 |
| C | 1.81182  | 0.53305  | -0.21592 |
| C | 1.46148  | 0.06046  | 1.17240  |
| H | -0.19488 | -1.48019 | 1.59481  |
| H | 0.18486  | -2.29068 | -0.90335 |
| H | 1.84259  | -0.58722 | -2.12687 |
| H | 2.57302  | 1.29220  | -0.41138 |
| H | 1.17423  | 0.83759  | 1.89319  |
| H | 2.34460  | -0.47773 | 1.57490  |

**TS: exo\_CP + A**

$E = -385.342776$

$H = -385.333980$

$G = -385.375205$

$N_{\text{imag}} = 1, -460.6969i \text{ cm}^{-1}$

|   |          |          |          |
|---|----------|----------|----------|
| C | -2.13339 | -0.02150 | -0.55796 |
| C | -1.35122 | -1.17642 | -0.74380 |
| C | -0.37188 | -1.21782 | 0.24116  |
| C | -1.62822 | 0.70006  | 0.52839  |
| C | -0.78119 | -0.26026 | 1.32206  |
| H | -2.92182 | 0.32276  | -1.23016 |
| H | -1.42557 | -1.86254 | -1.58911 |
| H | 0.35784  | -2.01919 | 0.37511  |
| H | -2.13608 | 1.55727  | 0.97709  |
| H | 0.03009  | 0.18232  | 1.91565  |
| H | -1.45553 | -0.80385 | 2.01553  |
| C | 0.92384  | 0.51741  | -0.67600 |
| C | 0.09087  | 1.59123  | -0.38301 |
| C | 2.07833  | 0.20735  | 0.17911  |
| H | 2.09740  | 0.77285  | 1.15072  |
| O | 2.95716  | -0.57275 | -0.08837 |
| H | 0.95078  | 0.07381  | -1.67355 |
| H | 0.32600  | 2.21249  | 0.48975  |
| H | -0.44326 | 2.10586  | -1.18369 |

**PC: endo\_CP + A**

$E = -385.405568$

$H = -385.397453$

$G = -385.437502$

$N_{\text{imag}} = 0$

|   |          |          |          |
|---|----------|----------|----------|
| C | -0.73696 | 0.50900  | 0.30359  |
| C | 0.17875  | 1.23460  | -0.72383 |
| H | 0.16873  | 2.32190  | -0.55178 |
| C | -1.91522 | -0.18990 | -0.32300 |
| O | -3.05049 | -0.07939 | 0.04873  |
| H | -1.65999 | -0.85279 | -1.19098 |
| H | -1.13786 | 1.20526  | 1.05557  |
| H | -0.13172 | 1.05890  | -1.76699 |
| C | 0.26510  | -0.48320 | 1.00226  |
| C | 0.73005  | -1.47697 | -0.04917 |
| C | 1.52321  | -0.81488 | -0.90186 |
| C | 1.58805  | 0.62798  | -0.43578 |
| C | 1.50336  | 0.42888  | 1.08855  |
| H | -0.12287 | -0.90418 | 1.93889  |
| H | 0.38944  | -2.51108 | -0.13371 |
| H | 1.95865  | -1.19575 | -1.82822 |
| H | 2.42282  | 1.22798  | -0.82143 |
| H | 1.31757  | 1.36377  | 1.64355  |
| H | 2.38108  | -0.09204 | 1.50070  |

**PC: exo\_CP + A**

**E** = -385.405056

**H** = -385.396891

**G** = -385.437131

**N<sub>imag</sub>** = 0

|   |          |          |          |
|---|----------|----------|----------|
| C | -2.11705 | -0.17308 | -0.59131 |
| C | -1.41473 | -1.29196 | -0.37026 |
| C | -0.22938 | -0.91815 | 0.50048  |
| C | -1.40768 | 0.95868  | 0.12931  |
| C | -0.85193 | 0.20553  | 1.35104  |
| H | -2.97699 | -0.05437 | -1.25372 |
| H | -1.57464 | -2.27535 | -0.81691 |
| H | 0.26907  | -1.74314 | 1.02761  |
| H | -2.00070 | 1.86266  | 0.32138  |
| H | -0.11775 | 0.79227  | 1.92896  |
| H | -1.64195 | -0.16714 | 2.02040  |
| C | 0.72176  | -0.09403 | -0.44848 |
| C | -0.08508 | 1.21955  | -0.65560 |
| C | 2.06390  | 0.14033  | 0.19804  |
| H | 2.04119  | 0.75551  | 1.13729  |
| O | 3.10358  | -0.29150 | -0.21469 |
| H | 0.90889  | -0.63850 | -1.38467 |
| H | 0.44534  | 2.08586  | -0.22243 |
| H | -0.25998 | 1.43301  | -1.71980 |

**TS: endo\_CP + U**

**E** = -610.284702

**H** = -610.269952

**G** = -610.326211

**N<sub>imag</sub>** = 1, -460.6106i cm<sup>-1</sup>

|   |          |          |          |
|---|----------|----------|----------|
| C | -0.91176 | 1.22063  | -0.71766 |
| C | -2.30622 | 1.18570  | -0.76039 |
| C | -0.25509 | 1.84509  | 0.42030  |
| O | 0.89253  | 2.24661  | 0.46668  |
| H | -0.91442 | 1.95952  | 1.31812  |
| C | -0.58311 | -1.10186 | -0.00712 |
| C | -1.13907 | -0.94221 | 1.25670  |
| C | -2.52733 | -0.76201 | 1.12499  |
| C | -2.85941 | -0.73834 | -0.23746 |
| C | -1.70090 | -1.37246 | -0.96542 |
| H | 2.10073  | 1.34618  | -0.82028 |
| H | -0.30376 | 1.03791  | -1.60756 |
| H | -2.80434 | 1.14001  | -1.73334 |
| H | -2.86613 | 1.72910  | 0.00681  |
| H | 0.46213  | -1.34364 | -0.21100 |
| H | -0.56622 | -0.88135 | 2.18337  |
| H | -3.21856 | -0.54658 | 1.94254  |
| H | -3.88817 | -0.79085 | -0.60274 |
| H | -1.53608 | -1.05020 | -2.00270 |
| H | -1.86580 | -2.46979 | -0.97021 |
| H | 2.31497  | 0.85298  | 1.39557  |

|   |         |          |          |
|---|---------|----------|----------|
| N | 2.40792 | -0.13225 | 1.16993  |
| C | 2.67055 | -0.53102 | -0.12283 |
| H | 2.72078 | -0.77224 | 1.88970  |
| N | 2.53130 | 0.45498  | -1.06062 |
| H | 2.62228 | 0.16882  | -2.02652 |
| O | 2.96272 | -1.67913 | -0.40089 |

**TS: exo\_CP + U-A**

**E** = -610.284689

**H** = -610.270159

**G** = -610.325662

**N<sub>imag</sub>** = 1, -438.5839i cm<sup>-1</sup>

|   |          |          |          |
|---|----------|----------|----------|
| C | -2.36474 | 1.69462  | 0.51789  |
| C | -0.96571 | 1.67867  | 0.35966  |
| C | -0.63820 | 0.78051  | -0.64562 |
| C | -2.93593 | 0.75070  | -0.34511 |
| C | -1.89459 | 0.45500  | -1.39431 |
| H | -2.90877 | 2.25908  | 1.27813  |
| H | -0.24110 | 2.20152  | 0.98545  |
| H | 0.37416  | 0.57290  | -1.00561 |
| H | -4.00968 | 0.68252  | -0.53738 |
| H | -1.94026 | -0.53761 | -1.86336 |
| H | -2.00893 | 1.21305  | -2.19627 |
| C | -1.16951 | -1.13152 | 0.77617  |
| C | -2.55690 | -1.02656 | 0.71336  |
| C | -0.43370 | -2.00457 | -0.11867 |
| H | -1.03877 | -2.45249 | -0.94759 |
| O | 0.75092  | -2.27887 | -0.03092 |
| H | -0.61451 | -0.73640 | 1.62989  |
| H | -3.09698 | -1.66860 | 0.00712  |
| H | -3.11890 | -0.76374 | 1.61157  |
| H | 1.72472  | -0.89966 | 1.11393  |
| H | 2.24130  | -1.18501 | -1.03303 |
| N | 2.65511  | -0.25663 | -1.09079 |
| H | 3.31187  | -0.07654 | -1.84162 |
| C | 2.91242  | 0.44290  | 0.07379  |
| N | 2.16120  | 0.02100  | 1.14781  |
| H | 2.45594  | 0.38929  | 2.04431  |
| O | 3.67870  | 1.38045  | 0.12249  |

**PC: endo\_CP + U-A**

**E** = -610.338571

**H** = -610.323908

**G** = -610.383489

**N<sub>imag</sub>** = 0

|   |          |          |          |
|---|----------|----------|----------|
| C | 1.29455  | -0.49279 | 0.08806  |
| C | 2.32851  | -0.72705 | 1.22965  |
| C | 0.25087  | 0.52620  | 0.43391  |
| O | -0.93745 | 0.35319  | 0.32884  |
| H | 0.64175  | 1.50385  | 0.80835  |
| C | 2.21437  | -0.04479 | -1.11066 |

|   |          |          |          |
|---|----------|----------|----------|
| C | 2.85394  | 1.27900  | -0.72675 |
| C | 3.74072  | 1.02722  | 0.24521  |
| C | 3.69674  | -0.46327 | 0.52720  |
| C | 3.39914  | -1.00271 | -0.88358 |
| H | -2.55749 | -0.96082 | -0.12335 |
| H | 0.77279  | -1.42267 | -0.18392 |
| H | 2.26071  | -1.76048 | 1.60219  |
| H | 2.17625  | -0.05289 | 2.08831  |
| H | 1.70802  | -0.08362 | -2.08375 |
| H | 2.56340  | 2.25633  | -1.11787 |
| H | 4.31914  | 1.75750  | 0.81510  |
| H | 4.56013  | -0.88499 | 1.05802  |
| H | 3.10922  | -2.06673 | -0.89552 |
| H | 4.22205  | -0.82386 | -1.59196 |
| H | -2.89013 | 1.22887  | 0.39600  |
| N | -3.85280 | 1.15520  | 0.08387  |
| C | -4.44392 | -0.07587 | -0.07918 |
| H | -4.48761 | 1.92430  | 0.25466  |
| N | -3.55630 | -1.12640 | -0.05843 |
| H | -3.93053 | -2.01956 | -0.35117 |
| O | -5.63925 | -0.22227 | -0.22838 |

**PC: exo\_CP + U-A**

**E** = -610.337904

**H** = -610.323185

**G** = -601.383006

**N<sub>imag</sub>** = 0

|   |          |          |          |
|---|----------|----------|----------|
| C | -3.95623 | 1.05467  | 0.10592  |
| C | -3.02352 | 1.41864  | -0.78367 |
| C | -2.12443 | 0.21782  | -1.01328 |
| C | -3.68955 | -0.39162 | 0.47978  |
| C | -3.14158 | -0.92790 | -0.85443 |
| H | -4.71010 | 1.69420  | 0.56937  |
| H | -2.84872 | 2.41486  | -1.19453 |
| H | -1.50842 | 0.23569  | -1.92267 |
| H | -4.52269 | -0.93915 | 0.93936  |
| H | -2.68630 | -1.92949 | -0.76963 |
| H | -3.89381 | -0.92892 | -1.65731 |
| C | -1.29638 | 0.08137  | 0.32439  |
| C | -2.38375 | -0.39135 | 1.33311  |
| C | -0.18551 | -0.91449 | 0.16443  |
| H | -0.49959 | -1.96585 | -0.05348 |
| O | 0.98750  | -0.64879 | 0.23718  |
| H | -0.83965 | 1.04187  | 0.60148  |
| H | -2.17304 | -1.41031 | 1.70231  |
| H | -2.44717 | 0.27307  | 2.20642  |
| H | 2.99379  | -1.28534 | -0.20030 |
| H | 2.50344  | 0.82827  | 0.48734  |
| N | 3.49458  | 1.03083  | 0.56358  |
| H | 3.79446  | 1.97901  | 0.74913  |
| C | 4.42546  | 0.22033  | -0.04228 |

|   |         |          |          |
|---|---------|----------|----------|
| N | 3.91352 | -0.97405 | -0.49454 |
| H | 4.60008 | -1.66306 | -0.77340 |
| O | 5.59175 | 0.53039  | -0.16858 |

**TS: endo\_CP + UPh-A**

**E** = -1071.688596

**H** = -1071.665058

**G** = -1071.744236

**N<sub>imag</sub>** = 1, -453.6662i cm<sup>-1</sup>

|   |          |          |          |
|---|----------|----------|----------|
| C | -0.92225 | -1.53658 | 0.45082  |
| C | -1.37265 | -2.24688 | 1.56251  |
| C | -0.41362 | -2.18959 | -0.73989 |
| O | 0.18909  | -1.64323 | -1.65230 |
| H | -0.61023 | -3.28910 | -0.79338 |
| C | -3.07844 | -1.27345 | -0.63734 |
| C | -3.43307 | -2.61325 | -0.73957 |
| C | -3.69412 | -3.10778 | 0.55014  |
| C | -3.44824 | -2.09426 | 1.48792  |
| C | -3.46929 | -0.79085 | 0.72542  |
| H | 0.00691  | 0.52631  | -1.54901 |
| H | -0.74688 | -0.46134 | 0.53028  |
| H | -1.31328 | -1.76889 | 2.54457  |
| H | -1.25958 | -3.33523 | 1.57925  |
| H | -2.84769 | -0.61309 | -1.47437 |
| H | -3.41558 | -3.20605 | -1.65562 |
| H | -3.92255 | -4.14701 | 0.79580  |
| H | -3.74019 | -2.16940 | 2.53833  |
| H | -2.87899 | 0.04304  | 1.13230  |
| H | -4.52719 | -0.45889 | 0.66934  |
| H | 1.72994  | -0.44144 | -1.17619 |
| N | 2.16622  | 0.28425  | -0.60859 |
| C | 1.35575  | 1.32780  | -0.22201 |
| N | 0.13190  | 1.28510  | -0.88067 |
| O | 1.65342  | 2.18053  | 0.58500  |
| C | 3.48096  | 0.02480  | -0.19984 |
| C | 4.24352  | 0.89594  | 0.59279  |
| C | 4.05182  | -1.18386 | -0.63166 |
| C | 5.54962  | 0.54526  | 0.93351  |
| C | 5.35557  | -1.51741 | -0.28282 |
| C | 6.11701  | -0.65349 | 0.50498  |
| H | 3.80954  | 1.83182  | 0.93644  |
| H | 3.45666  | -1.86333 | -1.24954 |
| H | 6.13344  | 1.23312  | 1.55076  |
| H | 5.77843  | -2.46286 | -0.63186 |
| H | 7.14152  | -0.91252 | 0.78060  |
| C | -1.03983 | 1.94834  | -0.49748 |
| C | -2.11822 | 1.93063  | -1.39669 |
| C | -1.20667 | 2.57232  | 0.75006  |
| C | -3.34590 | 2.48682  | -1.04979 |
| C | -2.43940 | 3.13487  | 1.07955  |
| C | -3.51784 | 3.09145  | 0.19581  |



|   |          |         |          |
|---|----------|---------|----------|
| H | -1.97864 | 1.47538 | -2.38203 |
| H | -0.36933 | 2.61931 | 1.44366  |
| H | -4.17072 | 2.45661 | -1.76653 |
| H | -2.55371 | 3.61784 | 2.05355  |
| H | -4.47700 | 3.53687 | 0.46821  |

**TS: exo\_CP + UPh-A**

$E = -1071.691932$

$H = -1071.668590$

$G = -1071.746104$

$N_{\text{imag}} = 1, -436.4597i \text{ cm}^{-1}$

|   |          |          |          |
|---|----------|----------|----------|
| C | -3.41909 | -2.12893 | -1.20430 |
| C | -2.76144 | -0.96423 | -1.12593 |
| C | -1.31293 | -1.28596 | -0.80335 |
| C | -2.42181 | -3.23879 | -0.92762 |
| C | -1.14837 | -2.62901 | -1.53793 |
| H | -4.49429 | -2.26999 | -1.33187 |
| H | -3.17590 | 0.04677  | -1.16564 |
| H | -0.58319 | -0.49234 | -1.01883 |
| H | -2.70685 | -4.24716 | -1.25588 |
| H | -0.22799 | -3.17795 | -1.27326 |
| H | -1.20944 | -2.51128 | -2.62998 |
| C | -1.35597 | -1.76574 | 0.70557  |
| C | -2.06942 | -3.14434 | 0.58857  |
| C | 0.01803  | -1.87882 | 1.29025  |
| H | 0.68311  | -2.65773 | 0.84050  |
| O | 0.44144  | -1.17954 | 2.18142  |
| H | -1.91822 | -1.04563 | 1.31659  |
| H | -1.39429 | -3.97071 | 0.87321  |
| H | -2.95696 | -3.19963 | 1.23482  |
| H | 1.81632  | 0.31437  | 1.64763  |
| H | -0.15513 | 0.87885  | 1.76984  |
| N | -0.18504 | 1.39985  | 0.89715  |
| C | 0.96166  | 1.38152  | 0.11866  |
| N | 2.02074  | 0.78247  | 0.76991  |
| O | 1.02296  | 1.83386  | -1.00431 |
| C | 3.28078  | 0.47905  | 0.22927  |
| C | 3.80120  | 1.08197  | -0.92486 |
| C | 4.05148  | -0.47502 | 0.91277  |
| C | 5.07225  | 0.72108  | -1.37070 |
| C | 5.32013  | -0.81836 | 0.45837  |
| C | 5.84031  | -0.22302 | -0.69100 |
| H | 3.21021  | 1.81944  | -1.46259 |
| H | 3.64082  | -0.95058 | 1.80906  |
| H | 5.46771  | 1.19726  | -2.27157 |
| H | 5.90372  | -1.56141 | 1.00758  |
| H | 6.83524  | -0.49202 | -1.05204 |
| C | -1.46139 | 1.82984  | 0.51095  |
| C | -2.51442 | 1.58578  | 1.40979  |
| C | -1.74305 | 2.46993  | -0.70667 |
| C | -3.81940 | 1.94939  | 1.09624  |

|   |          |         |          |
|---|----------|---------|----------|
| C | -3.05752 | 2.83088 | -1.00405 |
| C | -4.10373 | 2.57228 | -0.11945 |
| H | -2.29861 | 1.10634 | 2.36988  |
| H | -0.93805 | 2.67446 | -1.40749 |
| H | -4.61908 | 1.74457 | 1.81222  |
| H | -3.26101 | 3.32692 | -1.95657 |
| H | -5.12703 | 2.85984 | -0.36945 |

**PC: endo\_CP + UPh-A**

**E** = -1071.745927

**H** = -1071.722943

**G** = -1071.802435

**N<sub>imag</sub>** = 0

|   |          |          |          |
|---|----------|----------|----------|
| C | -1.77412 | -1.38812 | 0.01310  |
| C | -1.82911 | -2.14106 | 1.37471  |
| C | -0.89847 | -2.05024 | -1.00483 |
| O | -0.05716 | -1.48649 | -1.66685 |
| H | -1.06592 | -3.14573 | -1.14685 |
| C | -3.29145 | -1.35348 | -0.41472 |
| C | -3.74393 | -2.78706 | -0.63192 |
| C | -3.79188 | -3.37626 | 0.57038  |
| C | -3.35954 | -2.34827 | 1.59951  |
| C | -3.91815 | -1.06275 | 0.96133  |
| H | 0.05464  | 0.55320  | -1.34038 |
| H | -1.42452 | -0.35452 | 0.14904  |
| H | -1.38451 | -1.52266 | 2.16896  |
| H | -1.28790 | -3.10122 | 1.35536  |
| H | -3.49776 | -0.63954 | -1.22265 |
| H | -3.90632 | -3.25792 | -1.60387 |
| H | -3.99526 | -4.42848 | 0.78092  |
| H | -3.63334 | -2.55622 | 2.64199  |
| H | -3.53839 | -0.13505 | 1.42119  |
| H | -5.01792 | -1.04891 | 0.92287  |
| H | 1.76415  | -0.48446 | -1.14972 |
| N | 2.24594  | 0.16819  | -0.53758 |
| C | 1.53349  | 1.27465  | -0.11711 |
| N | 0.28523  | 1.32319  | -0.71573 |
| O | 1.94301  | 2.09815  | 0.67042  |
| C | 3.54441  | -0.20776 | -0.16708 |
| C | 4.38180  | 0.56455  | 0.65242  |
| C | 4.01677  | -1.43422 | -0.66304 |
| C | 5.66093  | 0.09951  | 0.95597  |
| C | 5.29540  | -1.88214 | -0.35111 |
| C | 6.13016  | -1.11712 | 0.46382  |
| H | 4.02640  | 1.51460  | 1.04351  |
| H | 3.36572  | -2.03888 | -1.30216 |
| H | 6.30289  | 0.71149  | 1.59494  |
| H | 5.64002  | -2.83929 | -0.75057 |
| H | 7.13503  | -1.46592 | 0.71104  |
| C | -0.77270 | 2.19155  | -0.42562 |
| C | -1.96461 | 1.99913  | -1.14634 |

|   |          |         |          |
|---|----------|---------|----------|
| C | -0.71996 | 3.20689 | 0.54189  |
| C | -3.08422 | 2.78584 | -0.89775 |
| C | -1.85070 | 3.98916 | 0.77586  |
| C | -3.03689 | 3.78850 | 0.07128  |
| H | -1.99972 | 1.22360 | -1.91886 |
| H | 0.20006  | 3.37221 | 1.09745  |
| H | -3.99808 | 2.61608 | -1.47312 |
| H | -1.79534 | 4.77617 | 1.53245  |
| H | -3.91217 | 4.41089 | 0.26846  |

**PC: exo\_CP + UPh-A**

**E** = -1071.691932

**H** = -1071.668590

**G** = -1070.746104

**N<sub>imag</sub>** = 0

|   |          |          |          |
|---|----------|----------|----------|
| C | -3.41909 | -2.12893 | -1.20430 |
| C | -2.76144 | -0.96423 | -1.12593 |
| C | -1.31293 | -1.28596 | -0.80335 |
| C | -2.42181 | -3.23879 | -0.92762 |
| C | -1.14837 | -2.62901 | -1.53793 |
| H | -4.49429 | -2.26999 | -1.33187 |
| H | -3.17590 | 0.04677  | -1.16564 |
| H | -0.58319 | -0.49234 | -1.01883 |
| H | -2.70685 | -4.24716 | -1.25588 |
| H | -0.22799 | -3.17795 | -1.27326 |
| H | -1.20944 | -2.51128 | -2.62998 |
| C | -1.35597 | -1.76574 | 0.70557  |
| C | -2.06942 | -3.14434 | 0.58857  |
| C | 0.01803  | -1.87882 | 1.29025  |
| H | 0.68311  | -2.65773 | 0.84050  |
| O | 0.44144  | -1.17954 | 2.18142  |
| H | -1.91822 | -1.04563 | 1.31659  |
| H | -1.39429 | -3.97071 | 0.87321  |
| H | -2.95696 | -3.19963 | 1.23482  |
| H | 1.81632  | 0.31437  | 1.64763  |
| H | -0.15513 | 0.87885  | 1.76984  |
| N | -0.18504 | 1.39985  | 0.89715  |
| C | 0.96166  | 1.38152  | 0.11866  |
| N | 2.02074  | 0.78247  | 0.76991  |
| O | 1.02296  | 1.83386  | -1.00431 |
| C | 3.28078  | 0.47905  | 0.22927  |
| C | 3.80120  | 1.08197  | -0.92486 |
| C | 4.05148  | -0.47502 | 0.91277  |
| C | 5.07225  | 0.72108  | -1.37070 |
| C | 5.32013  | -0.81836 | 0.45837  |
| C | 5.84031  | -0.22302 | -0.69100 |
| H | 3.21021  | 1.81944  | -1.46259 |
| H | 3.64082  | -0.95058 | 1.80906  |
| H | 5.46771  | 1.19726  | -2.27157 |
| H | 5.90372  | -1.56141 | 1.00758  |
| H | 6.83524  | -0.49202 | -1.05204 |

|   |          |         |          |
|---|----------|---------|----------|
| C | -1.46139 | 1.82984 | 0.51095  |
| C | -2.51442 | 1.58578 | 1.40979  |
| C | -1.74305 | 2.46993 | -0.70667 |
| C | -3.81940 | 1.94939 | 1.09624  |
| C | -3.05752 | 2.83088 | -1.00405 |
| C | -4.10373 | 2.57228 | -0.11945 |
| H | -2.29861 | 1.10634 | 2.36988  |
| H | -0.93805 | 2.67446 | -1.40749 |
| H | -4.61908 | 1.74457 | 1.81222  |
| H | -3.26101 | 3.32692 | -1.95657 |
| H | -5.12703 | 2.85984 | -0.36945 |

**TS: endo\_CP + UF-A**

**E** = -2418.440410

**H** = -2418.403313

**G** = -2418.517151

**N<sub>imag</sub>** = 1, -444.7589i cm<sup>-1</sup>

|   |          |          |          |
|---|----------|----------|----------|
| C | -1.52576 | -2.53082 | 1.08387  |
| C | -1.69065 | -3.19287 | 2.30328  |
| C | -0.67638 | -3.08168 | 0.05367  |
| O | -0.24418 | -2.48284 | -0.92483 |
| H | -0.39790 | -4.15355 | 0.19749  |
| C | -3.60590 | -3.41411 | 0.02728  |
| C | -3.25566 | -4.75647 | 0.07223  |
| C | -3.25428 | -5.17742 | 1.41435  |
| C | -3.53828 | -4.08017 | 2.24113  |
| C | -4.17266 | -3.03411 | 1.35867  |
| H | -0.63660 | -0.66782 | -0.94802 |
| H | -1.84279 | -1.48912 | 0.97255  |
| H | -1.93382 | -2.59689 | 3.18794  |
| H | -1.07176 | -4.07096 | 2.51069  |
| H | -3.74545 | -2.83217 | -0.88658 |
| H | -2.95567 | -5.36198 | -0.78455 |
| H | -2.96059 | -6.16859 | 1.76619  |
| H | -3.78243 | -4.18365 | 3.30127  |
| H | -4.04540 | -1.98541 | 1.65811  |
| H | -5.26252 | -3.23913 | 1.32068  |
| H | 1.31650  | -1.04845 | -0.86380 |
| N | 1.62796  | -0.12105 | -0.57885 |
| C | 0.64838  | 0.84171  | -0.40755 |
| N | -0.60025 | 0.32753  | -0.70170 |
| O | 0.85554  | 1.97878  | -0.05008 |
| C | 2.99890  | 0.02462  | -0.37160 |
| C | 3.61195  | 1.22307  | 0.01725  |
| C | 3.79865  | -1.11461 | -0.56921 |
| C | 4.99460  | 1.25360  | 0.20359  |
| C | 5.17156  | -1.05335 | -0.38229 |
| C | 5.79223  | 0.13275  | 0.01133  |
| H | 3.01206  | 2.11803  | 0.17365  |
| H | 3.33451  | -2.05782 | -0.86871 |
| H | 6.87102  | 0.17759  | 0.16644  |

|   |          |          |          |
|---|----------|----------|----------|
| C | -1.82771 | 0.96279  | -0.57416 |
| C | -2.96024 | 0.20490  | -0.91841 |
| C | -2.00825 | 2.27867  | -0.12266 |
| C | -4.23547 | 0.73718  | -0.79419 |
| C | -3.30106 | 2.79244  | -0.02060 |
| C | -4.42784 | 2.04290  | -0.34444 |
| H | -2.82305 | -0.81084 | -1.29972 |
| H | -1.14377 | 2.88593  | 0.14260  |
| H | -5.42872 | 2.46668  | -0.25677 |
| C | 6.01862  | -2.27018 | -0.65068 |
| F | 6.56398  | -2.22435 | -1.86771 |
| F | 7.02032  | -2.36884 | 0.22339  |
| F | 5.30585  | -3.39639 | -0.58067 |
| C | 5.60743  | 2.55585  | 0.65458  |
| F | 6.93982  | 2.50377  | 0.65456  |
| F | 5.24165  | 3.56493  | -0.13580 |
| F | 5.21908  | 2.86872  | 1.89201  |
| C | -5.41806 | -0.14056 | -1.10209 |
| F | -6.48521 | 0.56154  | -1.46544 |
| F | -5.14537 | -1.01246 | -2.07818 |
| F | -5.77243 | -0.87096 | -0.03236 |
| C | -3.45064 | 4.22043  | 0.44415  |
| F | -4.72823 | 4.54198  | 0.65150  |
| F | -2.79112 | 4.43017  | 1.58333  |
| F | -2.96268 | 5.07499  | -0.45479 |

**TS: exo\_CP + UF-A**

**E** = -2418.441687

**H** = -2418.403739

**G** = -2418.520680

**N<sub>imag</sub>** = 1, -433.6023i cm<sup>-1</sup>

|   |          |          |          |
|---|----------|----------|----------|
| C | 3.70378  | -2.07810 | 2.53218  |
| C | 2.97649  | -1.05341 | 1.89417  |
| C | 1.63588  | -1.40304 | 1.88415  |
| C | 2.83236  | -3.12003 | 2.87786  |
| C | 1.44213  | -2.53513 | 2.84458  |
| H | 4.79042  | -2.10625 | 2.63462  |
| H | 3.40807  | -0.16676 | 1.42462  |
| H | 0.82357  | -0.79951 | 1.47092  |
| H | 3.11469  | -3.93477 | 3.54940  |
| H | 0.62260  | -3.23206 | 2.62241  |
| H | 1.24794  | -2.09408 | 3.84388  |
| C | 2.03467  | -3.22500 | 0.19536  |
| C | 2.65566  | -4.11154 | 1.07627  |
| C | 0.62389  | -3.31001 | -0.08885 |
| H | 0.05361  | -4.04299 | 0.53211  |
| O | 0.02220  | -2.66698 | -0.94220 |
| H | 2.63832  | -2.57903 | -0.44487 |
| H | 2.06151  | -4.93708 | 1.48671  |
| H | 3.71466  | -4.33896 | 0.93824  |
| H | -1.33900 | -1.21826 | -0.97078 |

|   |          |          |          |
|---|----------|----------|----------|
| H | 0.61085  | -0.91629 | -1.37730 |
| N | 0.64678  | 0.07849  | -1.13628 |
| C | -0.55029 | 0.66958  | -0.76480 |
| N | -1.58631 | -0.24421 | -0.79216 |
| O | -0.66463 | 1.83264  | -0.45077 |
| C | -2.93315 | 0.00455  | -0.52790 |
| C | -3.46278 | 1.27405  | -0.26471 |
| C | -3.79693 | -1.10532 | -0.53423 |
| C | -4.82977 | 1.40522  | -0.01369 |
| C | -5.15105 | -0.94471 | -0.28392 |
| C | -5.68971 | 0.31501  | -0.01622 |
| H | -2.81192 | 2.14673  | -0.25208 |
| H | -3.39615 | -2.10231 | -0.73449 |
| H | -6.75418 | 0.43877  | 0.18803  |
| C | 1.92182  | 0.60471  | -0.96785 |
| C | 2.99063  | -0.15071 | -1.47136 |
| C | 2.20255  | 1.79883  | -0.28066 |
| C | 4.30521  | 0.22931  | -1.22812 |
| C | 3.52851  | 2.16831  | -0.07400 |
| C | 4.59733  | 1.39524  | -0.52826 |
| H | 2.78552  | -1.05805 | -2.04651 |
| H | 1.38846  | 2.41890  | 0.09079  |
| H | 5.62907  | 1.69862  | -0.34504 |
| C | -6.07373 | -2.13461 | -0.33849 |
| F | -6.75671 | -2.16841 | -1.48391 |
| F | -5.40610 | -3.28593 | -0.24116 |
| F | -6.96896 | -2.09995 | 0.64913  |
| C | -5.35159 | 2.78879  | 0.28345  |
| F | -6.67772 | 2.80144  | 0.41889  |
| F | -4.82810 | 3.27104  | 1.41178  |
| F | -5.03616 | 3.64428  | -0.68922 |
| C | 3.82416  | 3.38839  | 0.76168  |
| F | 3.98985  | 3.04967  | 2.04511  |
| F | 4.94716  | 3.99028  | 0.36933  |
| F | 2.84018  | 4.28061  | 0.71105  |
| C | 5.40025  | -0.70610 | -1.66508 |
| F | 6.60408  | -0.14893 | -1.57775 |
| F | 5.41135  | -1.80400 | -0.89214 |
| F | 5.22672  | -1.12204 | -2.91861 |

**PC: endo\_CP + UF-A**

**E** = -2418.469001

**H** = -2418.458745

**G** = -2418.573998

**N<sub>imag</sub>** = 0

|   |          |         |          |
|---|----------|---------|----------|
| C | -2.00634 | 2.72940 | -0.70540 |
| C | -1.98143 | 3.25743 | -2.17121 |
| C | -0.88693 | 3.25535 | 0.13614  |
| O | -0.17548 | 2.57445 | 0.84204  |
| H | -0.72330 | 4.35827 | 0.09535  |
| C | -3.42880 | 3.19801 | -0.20425 |

|   |          |          |          |
|---|----------|----------|----------|
| C | -3.43592 | 4.71705  | -0.20426 |
| C | -3.43029 | 5.11599  | -1.48301 |
| C | -3.40538 | 3.87021  | -2.34886 |
| C | -4.23843 | 2.90929  | -1.48148 |
| H | -0.62168 | 0.66479  | 0.96255  |
| H | -1.96353 | 1.62923  | -0.68546 |
| H | -1.81055 | 2.42571  | -2.87116 |
| H | -1.19112 | 4.00650  | -2.34228 |
| H | -3.75987 | 2.70873  | 0.72166  |
| H | -3.37119 | 5.34734  | 0.68517  |
| H | -3.35333 | 6.14043  | -1.85350 |
| H | -3.70686 | 3.99738  | -3.39655 |
| H | -4.18256 | 1.85585  | -1.80232 |
| H | -5.28986 | 3.21665  | -1.38090 |
| H | 1.34062  | 1.07257  | 0.82680  |
| N | 1.65045  | 0.14028  | 0.56212  |
| C | 0.67487  | -0.82917 | 0.41138  |
| N | -0.57773 | -0.32337 | 0.71194  |
| O | 0.88480  | -1.96815 | 0.06470  |
| C | 3.02288  | -0.00206 | 0.35139  |
| C | 3.63889  | -1.20870 | -0.01713 |
| C | 3.81574  | 1.14310  | 0.51446  |
| C | 5.01776  | -1.23765 | -0.20904 |
| C | 5.19034  | 1.08479  | 0.31692  |
| C | 5.81209  | -0.10451 | -0.05186 |
| H | 3.04079  | -2.10614 | -0.16071 |
| H | 3.34910  | 2.09328  | 0.78941  |
| H | 6.88853  | -0.14459 | -0.22458 |
| C | -1.80339 | -0.97216 | 0.59313  |
| C | -2.93850 | -0.24944 | 0.99809  |
| C | -1.97375 | -2.26857 | 0.08849  |
| C | -4.20922 | -0.78907 | 0.86361  |
| C | -3.26190 | -2.79464 | -0.01714 |
| C | -4.39198 | -2.07482 | 0.35517  |
| H | -2.81508 | 0.74542  | 1.43463  |
| H | -1.10681 | -2.85418 | -0.21463 |
| H | -5.38890 | -2.50698 | 0.26262  |
| C | 6.00981  | 2.32813  | 0.54820  |
| F | 7.16717  | 2.28554  | -0.10873 |
| F | 5.35588  | 3.42358  | 0.15294  |
| F | 6.29274  | 2.49079  | 1.84218  |
| C | 5.67575  | -2.55069 | -0.55501 |
| F | 4.85619  | -3.35201 | -1.23229 |
| F | 6.77033  | -2.36589 | -1.29522 |
| F | 6.05225  | -3.20677 | 0.54456  |
| C | -5.40151 | 0.05841  | 1.22059  |
| F | -6.43494 | -0.67654 | 1.61848  |
| F | -5.11486 | 0.92819  | 2.19396  |
| F | -5.81193 | 0.78160  | 0.17000  |
| C | -3.39685 | -4.19247 | -0.56986 |
| F | -4.66563 | -4.60107 | -0.58089 |

|   |          |          |          |
|---|----------|----------|----------|
| F | -2.94082 | -4.26062 | -1.82135 |
| F | -2.69561 | -5.06660 | 0.15051  |

**PC: exo\_CP + UF-A**

**E** = -2418.496735

**H** = -2418.459436

**G** = -2418.575471

**N<sub>imag</sub>** = 0

|   |          |          |          |
|---|----------|----------|----------|
| C | 3.92482  | 1.97032  | -2.43273 |
| C | 3.12250  | 1.03726  | -1.90357 |
| C | 1.74748  | 1.66158  | -1.75557 |
| C | 3.09610  | 3.22366  | -2.64618 |
| C | 1.72847  | 2.59868  | -2.97788 |
| H | 5.00132  | 1.89411  | -2.59713 |
| H | 3.39715  | 0.03840  | -1.55598 |
| H | 0.90514  | 0.96727  | -1.62179 |
| H | 3.49904  | 3.95902  | -3.35460 |
| H | 0.90007  | 3.32859  | -2.97468 |
| H | 1.73041  | 2.04123  | -3.92611 |
| C | 1.90495  | 2.71825  | -0.58010 |
| C | 2.79949  | 3.80560  | -1.22972 |
| C | 0.55101  | 3.19710  | -0.15603 |
| H | 0.06659  | 3.97273  | -0.79735 |
| O | -0.05309 | 2.76174  | 0.79928  |
| H | 2.38402  | 2.24219  | 0.28516  |
| H | 2.26483  | 4.76774  | -1.31515 |
| H | 3.71496  | 3.97734  | -0.64599 |
| H | -1.39728 | 1.23033  | 1.07056  |
| H | 0.58658  | 0.93037  | 1.43076  |
| N | 0.62041  | -0.04963 | 1.15186  |
| C | -0.57741 | -0.63329 | 0.76882  |
| N | -1.62619 | 0.26270  | 0.85422  |
| O | -0.68409 | -1.78169 | 0.40641  |
| C | -2.97130 | 0.01149  | 0.57355  |
| C | -3.48723 | -1.25500 | 0.26946  |
| C | -3.84569 | 1.11006  | 0.61852  |
| C | -4.85279 | -1.39286 | 0.01924  |
| C | -5.19964 | 0.94362  | 0.36484  |
| C | -5.72574 | -0.31260 | 0.06408  |
| H | -2.82851 | -2.12086 | 0.23271  |
| H | -3.45831 | 2.10308  | 0.86201  |
| H | -6.79250 | -0.44445 | -0.12158 |
| C | 1.89780  | -0.57996 | 0.98441  |
| C | 2.96589  | 0.15274  | 1.52042  |
| C | 2.17733  | -1.76025 | 0.27534  |
| C | 4.28074  | -0.23190 | 1.28609  |
| C | 3.50319  | -2.13835 | 0.08151  |
| C | 4.57202  | -1.38496 | 0.56602  |
| H | 2.76489  | 1.04717  | 2.11736  |
| H | 1.36416  | -2.36440 | -0.12314 |
| H | 5.60347  | -1.69186 | 0.38832  |



|   |          |          |          |
|---|----------|----------|----------|
| C | -6.10819 | 2.14599  | 0.36445  |
| F | -7.32670 | 1.83802  | 0.80559  |
| F | -5.62993 | 3.12563  | 1.13392  |
| F | -6.24955 | 2.64655  | -0.86508 |
| C | -5.36350 | -2.76823 | -0.33231 |
| F | -4.90412 | -3.68828 | 0.51538  |
| F | -6.69517 | -2.82289 | -0.30915 |
| F | -4.96941 | -3.13061 | -1.55429 |
| C | 3.79029  | -3.34025 | -0.78300 |
| F | 4.94968  | -3.91264 | -0.46002 |
| F | 2.83628  | -4.26161 | -0.68893 |
| F | 3.87258  | -2.98292 | -2.06931 |
| C | 5.37483  | 0.68069  | 1.77315  |
| F | 6.57863  | 0.12915  | 1.65701  |
| F | 5.38422  | 1.82050  | 1.06910  |
| F | 5.19783  | 1.02063  | 3.05041  |

**TS: endo\_CP + TU-A**

**E** = -933.189032

**H** = -993.174058

**G** = -993.230977

**N<sub>imag</sub>** = 1, -457.0710i cm<sup>-1</sup>

|   |          |          |          |
|---|----------|----------|----------|
| C | 1.38030  | -1.12111 | -0.81266 |
| C | 2.74234  | -0.82342 | -0.89472 |
| C | 0.89067  | -1.92230 | 0.29259  |
| O | -0.18391 | -2.49554 | 0.35669  |
| H | 1.60551  | -2.00256 | 1.15004  |
| C | 0.67582  | 1.05522  | 0.13302  |
| C | 1.33331  | 0.89658  | 1.34739  |
| C | 2.72024  | 0.97506  | 1.13037  |
| C | 2.96270  | 1.11435  | -0.24477 |
| C | 1.66653  | 1.58677  | -0.85457 |
| H | -1.57769 | -1.77851 | -0.85886 |
| H | 0.70891  | -0.97451 | -1.66277 |
| H | 3.17718  | -0.61873 | -1.87759 |
| H | 3.42625  | -1.31442 | -0.19569 |
| H | -0.40772 | 1.12461  | -0.00299 |
| H | 0.84623  | 0.66992  | 2.29737  |
| H | 3.48983  | 0.82636  | 1.89082  |
| H | 3.94047  | 1.38467  | -0.65162 |
| H | 1.48969  | 1.32100  | -1.90564 |
| H | 1.63969  | 2.69320  | -0.77380 |
| H | -1.71148 | -1.48337 | 1.37331  |
| N | -2.14858 | -0.57495 | 1.23472  |
| C | -2.48397 | -0.13298 | 0.00125  |
| H | -2.45328 | -0.01791 | 2.02239  |
| N | -2.14680 | -0.94629 | -1.02059 |
| H | -2.36787 | -0.62863 | -1.95515 |
| S | -3.22465 | 1.35268  | -0.23686 |

**TS: exo\_CP + TU-A** $E = -933.189032$  $H = -993.174058$  $G = -993.230977$  $N_{\text{imag}} = 1, -457.0710i \text{ cm}^{-1}$ 

|   |          |          |          |
|---|----------|----------|----------|
| C | -2.09395 | 1.90203  | 0.55844  |
| C | -0.74598 | 1.65955  | 0.22871  |
| C | -0.70293 | 0.72365  | -0.79345 |
| C | -2.91764 | 1.06543  | -0.20815 |
| C | -2.07811 | 0.59983  | -1.37134 |
| H | -2.43984 | 2.55246  | 1.36461  |
| H | 0.13985  | 2.06424  | 0.72446  |
| H | 0.21030  | 0.36763  | -1.27515 |
| H | -4.00186 | 1.18860  | -0.27278 |
| H | -2.34026 | -0.37490 | -1.80579 |
| H | -2.17107 | 1.36285  | -2.17128 |
| C | -1.40759 | -1.09303 | 0.75822  |
| C | -2.75348 | -0.73496 | 0.81527  |
| C | -0.92303 | -2.09917 | -0.16429 |
| H | -1.65552 | -2.41126 | -0.95156 |
| O | 0.17916  | -2.62374 | -0.13804 |
| H | -0.71965 | -0.78747 | 1.54901  |
| H | -3.46261 | -1.27559 | 0.17664  |
| H | -3.17282 | -0.38378 | 1.76024  |
| H | 1.92841  | -1.81392 | -1.05123 |
| H | 1.43032  | -1.63140 | 1.12354  |
| N | 1.93837  | -0.74884 | 1.19519  |
| H | 1.91033  | -0.19854 | 2.04380  |
| C | 2.39777  | -0.14008 | 0.08191  |
| N | 2.36052  | -0.89230 | -1.04218 |
| H | 2.71669  | -0.47635 | -1.89290 |
| S | 2.96574  | 1.43724  | 0.07998  |

**PC: endo\_CP + TU-A** $E = -933.241919$  $H = -933.226980$  $G = -933.286917$  $N_{\text{imag}} = 0$ 

|   |          |          |          |
|---|----------|----------|----------|
| C | 1.77608  | -0.46386 | 0.21310  |
| C | 2.83883  | -0.44815 | 1.35245  |
| C | 0.74514  | 0.61379  | 0.35100  |
| O | -0.44714 | 0.43185  | 0.31366  |
| H | 1.14613  | 1.64660  | 0.49206  |
| C | 2.66558  | -0.29565 | -1.07768 |
| C | 3.31587  | 1.07606  | -1.01007 |
| C | 4.22649  | 1.03832  | -0.02828 |
| C | 4.18855  | -0.35346 | 0.57539  |
| C | 3.85472  | -1.18793 | -0.67447 |
| H | -2.04715 | -0.90215 | 0.06513  |
| H | 1.24664  | -1.42732 | 0.16502  |
| H | 2.77943  | -1.37454 | 1.94368  |

|   |          |          |          |
|---|----------|----------|----------|
| H | 2.70905  | 0.39844  | 2.04625  |
| H | 2.13443  | -0.54448 | -2.00547 |
| H | 3.01751  | 1.94502  | -1.60040 |
| H | 4.82072  | 1.87188  | 0.35214  |
| H | 5.06482  | -0.65352 | 1.16453  |
| H | 3.56405  | -2.22681 | -0.44519 |
| H | 4.65918  | -1.17407 | -1.42512 |
| H | -2.35209 | 1.32156  | 0.30935  |
| N | -3.35642 | 1.20815  | 0.20017  |
| C | -3.91780 | -0.00534 | 0.00068  |
| H | -3.97812 | 2.00453  | 0.23572  |
| N | -3.04882 | -1.04074 | -0.03769 |
| H | -3.43561 | -1.96223 | -0.19009 |
| S | -5.56724 | -0.21202 | -0.18544 |

**PC: exo\_CP + TU-A**

**E** = -933.241150

**H** = -933.226153

**G** = -933.286543

**N<sub>imag</sub>** = 0

|   |          |          |          |
|---|----------|----------|----------|
| C | -4.42651 | 1.08667  | 0.24288  |
| C | -3.59254 | 1.41113  | -0.75364 |
| C | -2.73021 | 0.19451  | -1.03547 |
| C | -4.13035 | -0.34865 | 0.63623  |
| C | -3.73096 | -0.93540 | -0.72905 |
| H | -5.12314 | 1.74877  | 0.76093  |
| H | -3.45753 | 2.39079  | -1.21600 |
| H | -2.21557 | 0.17537  | -2.00588 |
| H | -4.91275 | -0.87222 | 1.20081  |
| H | -3.27573 | -1.93813 | -0.65814 |
| H | -4.56432 | -0.95668 | -1.44695 |
| C | -1.76504 | 0.09805  | 0.21029  |
| C | -2.74120 | -0.33360 | 1.34518  |
| C | -0.68271 | -0.91177 | -0.02542 |
| H | -1.02418 | -1.95899 | -0.21727 |
| O | 0.49740  | -0.66272 | -0.03446 |
| H | -1.27930 | 1.06414  | 0.40697  |
| H | -2.49862 | -1.34245 | 1.72244  |
| H | -2.70544 | 0.35859  | 2.19818  |
| H | 2.46382  | -1.37621 | -0.27425 |
| H | 2.00193  | 0.77385  | 0.23862  |
| N | 2.99364  | 0.99589  | 0.25593  |
| H | 3.31581  | 1.93148  | 0.46269  |
| C | 3.93634  | 0.06057  | 0.00119  |
| N | 3.46027  | -1.17542 | -0.27009 |
| H | 4.13856  | -1.89950 | -0.46454 |
| S | 5.57244  | 0.40817  | 0.01963  |

**TS: endo\_CP + TUPh-A**

**E** = -1394.582257

**H** = -1394.558425

**G** = -1394.637765

**N<sub>imag</sub>** = 1, -454.6219i cm<sup>-1</sup>

|   |          |          |          |
|---|----------|----------|----------|
| C | -1.35946 | -1.61120 | 0.71717  |
| C | -2.14800 | -2.16219 | 1.72648  |
| C | -0.68690 | -2.42918 | -0.27331 |
| O | 0.16525  | -2.04512 | -1.06044 |
| H | -1.00611 | -3.50050 | -0.29331 |
| C | -3.14481 | -1.19185 | -0.87297 |
| C | -3.62638 | -2.48993 | -0.99814 |
| C | -4.24656 | -2.85603 | 0.20880  |
| C | -4.11083 | -1.80699 | 1.13016  |
| C | -3.78904 | -0.56975 | 0.32683  |
| H | 0.00283  | 0.18604  | -1.26424 |
| H | -1.05673 | -0.56208 | 0.77225  |
| H | -2.26434 | -1.60390 | 2.65993  |
| H | -2.18099 | -3.25001 | 1.84045  |
| H | -2.64333 | -0.62527 | -1.65951 |
| H | -3.46279 | -3.14750 | -1.85359 |
| H | -4.65259 | -3.84354 | 0.43788  |
| H | -4.65326 | -1.77149 | 2.07818  |
| H | -3.21582 | 0.22302  | 0.82877  |
| H | -4.75326 | -0.13001 | -0.00424 |
| H | 1.61541  | -0.78317 | -0.75364 |
| N | 2.16823  | 0.01728  | -0.43529 |
| C | 1.44031  | 1.13945  | -0.17272 |
| N | 0.16414  | 1.00550  | -0.67891 |
| S | 1.96717  | 2.49866  | 0.62540  |
| C | 3.51589  | -0.30080 | -0.19074 |
| C | 4.54398  | 0.63525  | -0.01816 |
| C | 3.82803  | -1.67055 | -0.17308 |
| C | 5.85005  | 0.19039  | 0.18578  |
| C | 5.13535  | -2.09880 | 0.02575  |
| C | 6.15809  | -1.16833 | 0.21371  |
| H | 4.32033  | 1.69874  | -0.04208 |
| H | 3.02579  | -2.39972 | -0.32254 |
| H | 6.64197  | 0.93153  | 0.32048  |
| H | 5.35389  | -3.16947 | 0.03632  |
| H | 7.18593  | -1.50051 | 0.37534  |
| C | -0.97656 | 1.78802  | -0.42307 |
| C | -1.90277 | 1.95619  | -1.46016 |
| C | -1.26273 | 2.32158  | 0.84224  |
| C | -3.10399 | 2.62730  | -1.23792 |
| C | -2.45667 | 3.00877  | 1.04976  |
| C | -3.38581 | 3.16176  | 0.01862  |
| H | -1.66595 | 1.55975  | -2.45187 |
| H | -0.54282 | 2.19819  | 1.65084  |
| H | -3.81437 | 2.74696  | -2.05976 |
| H | -2.66488 | 3.42575  | 2.03831  |

|                                                          |          |          |          |
|----------------------------------------------------------|----------|----------|----------|
| H                                                        | -4.31940 | 3.70151  | 0.19218  |
| <b>TS: exo_CP + TUPh-A</b>                               |          |          |          |
| <b>E</b> = -1394.584275                                  |          |          |          |
| <b>H</b> = -1394.560571                                  |          |          |          |
| <b>G</b> = -1394.639468                                  |          |          |          |
| <b>N<sub>imag</sub></b> = 1, -436.1877i cm <sup>-1</sup> |          |          |          |
| C                                                        | -4.27604 | -1.39970 | -1.08854 |
| C                                                        | -3.25893 | -0.42798 | -1.00880 |
| C                                                        | -2.03274 | -1.05985 | -1.14881 |
| C                                                        | -3.69745 | -2.66981 | -1.20836 |
| C                                                        | -2.27815 | -2.44441 | -1.66533 |
| H                                                        | -5.34245 | -1.20660 | -0.95471 |
| H                                                        | -3.40254 | 0.63151  | -0.78351 |
| H                                                        | -1.06026 | -0.56037 | -1.14802 |
| H                                                        | -4.26706 | -3.56660 | -1.46528 |
| H                                                        | -1.54426 | -3.21048 | -1.37978 |
| H                                                        | -2.29440 | -2.38983 | -2.77322 |
| C                                                        | -2.20806 | -2.09247 | 1.10282  |
| C                                                        | -3.18109 | -3.03643 | 0.77426  |
| C                                                        | -0.80649 | -2.44406 | 1.10364  |
| H                                                        | -0.56830 | -3.45860 | 0.69845  |
| O                                                        | 0.10625  | -1.74156 | 1.51330  |
| H                                                        | -2.47591 | -1.14231 | 1.57221  |
| H                                                        | -2.85874 | -4.06871 | 0.59132  |
| H                                                        | -4.18394 | -2.94409 | 1.19547  |
| H                                                        | 1.64410  | -0.68090 | 0.90881  |
| H                                                        | -0.03630 | 0.19731  | 1.24884  |
| N                                                        | 0.08571  | 0.99755  | 0.62318  |
| C                                                        | 1.34977  | 1.15352  | 0.10264  |
| N                                                        | 2.13423  | 0.08934  | 0.45054  |
| S                                                        | 1.83418  | 2.45402  | -0.81443 |
| C                                                        | 3.47637  | -0.21683 | 0.16108  |
| C                                                        | 4.47197  | 0.72327  | -0.13581 |
| C                                                        | 3.82252  | -1.57678 | 0.23376  |
| C                                                        | 5.77669  | 0.29065  | -0.37251 |
| C                                                        | 5.12858  | -1.99278 | 0.00343  |
| C                                                        | 6.11706  | -1.05913 | -0.30972 |
| H                                                        | 4.22434  | 1.78059  | -0.17940 |
| H                                                        | 3.04675  | -2.30907 | 0.47805  |
| H                                                        | 6.54234  | 1.03526  | -0.60466 |
| H                                                        | 5.37292  | -3.05610 | 0.06594  |
| H                                                        | 7.14368  | -1.38137 | -0.49708 |
| C                                                        | -1.06722 | 1.78633  | 0.49174  |
| C                                                        | -1.99375 | 1.72189  | 1.54597  |
| C                                                        | -1.37962 | 2.55346  | -0.64004 |
| C                                                        | -3.20571 | 2.40192  | 1.47434  |
| C                                                        | -2.59119 | 3.24205  | -0.69390 |
| C                                                        | -3.51199 | 3.17276  | 0.35201  |
| H                                                        | -1.74440 | 1.13586  | 2.43576  |
| H                                                        | -0.67577 | 2.60599  | -1.46752 |

|   |          |         |          |
|---|----------|---------|----------|
| H | -3.90838 | 2.33810 | 2.30885  |
| H | -2.81869 | 3.83849 | -1.58104 |
| H | -4.45652 | 3.71827 | 0.29572  |

**PC: endo\_CP + TUPh-A**

**E** = -1394.638937

**H** = -1394.615562

**G** = -1394.695157

**N<sub>imag</sub>** = 0

|   |          |          |          |
|---|----------|----------|----------|
| C | 1.79932  | -1.50893 | -0.33852 |
| C | 2.58512  | -1.95213 | -1.59892 |
| C | 0.83130  | -2.50286 | 0.22567  |
| O | -0.19072 | -2.20115 | 0.79682  |
| H | 1.11570  | -3.57987 | 0.13752  |
| C | 2.95469  | -1.20324 | 0.69420  |
| C | 3.68249  | -2.50891 | 0.96481  |
| C | 4.35888  | -2.82443 | -0.14769 |
| C | 4.07450  | -1.74477 | -1.17549 |
| C | 3.94342  | -0.51127 | -0.25927 |
| H | -0.05475 | 0.21291  | 1.29621  |
| H | 1.24844  | -0.57549 | -0.52175 |
| H | 2.32251  | -1.31493 | -2.45706 |
| H | 2.38435  | -2.99849 | -1.88225 |
| H | 2.61258  | -0.63565 | 1.56932  |
| H | 3.58522  | -3.10995 | 1.87156  |
| H | 4.92347  | -3.73982 | -0.33811 |
| H | 4.77473  | -1.67687 | -2.01810 |
| H | 3.51333  | 0.37624  | -0.75536 |
| H | 4.88835  | -0.24837 | 0.24062  |
| H | -1.64564 | -0.83628 | 0.71288  |
| N | -2.21059 | -0.03159 | 0.43767  |
| C | -1.49859 | 1.09994  | 0.15958  |
| N | -0.21926 | 0.99125  | 0.66142  |
| S | -2.05404 | 2.43523  | -0.65515 |
| C | -3.55778 | -0.35618 | 0.19112  |
| C | -4.59751 | 0.57932  | 0.11798  |
| C | -3.85440 | -1.72284 | 0.07059  |
| C | -5.90334 | 0.13844  | -0.09263 |
| C | -5.16261 | -2.14890 | -0.13178 |
| C | -6.19759 | -1.21795 | -0.22214 |
| H | -4.38265 | 1.64007  | 0.22335  |
| H | -3.04120 | -2.45182 | 0.14055  |
| H | -6.70570 | 0.87822  | -0.15033 |
| H | -5.37149 | -3.21756 | -0.22357 |
| H | -7.22553 | -1.54804 | -0.38726 |
| C | 0.90558  | 1.80379  | 0.41710  |
| C | 1.81548  | 1.99736  | 1.46357  |
| C | 1.18765  | 2.34387  | -0.84530 |
| C | 2.99472  | 2.71025  | 1.25501  |
| C | 2.35945  | 3.07169  | -1.03916 |
| C | 3.26994  | 3.25737  | 0.00282  |

|   |         |         |          |
|---|---------|---------|----------|
| H | 1.58603 | 1.58788 | 2.45167  |
| H | 0.48196 | 2.19613 | -1.66216 |
| H | 3.69331 | 2.85001 | 2.08351  |
| H | 2.56513 | 3.49440 | -2.02571 |
| H | 4.18702 | 3.82758 | -0.16060 |

**PC: exo\_CP + TUPh-A**

**E** = -1394.640778

**H** = -1394.617708

**G** = -1394.695413

**N<sub>imag</sub>** = 0

|   |          |          |          |
|---|----------|----------|----------|
| C | -4.56703 | -1.21432 | -0.70490 |
| C | -3.53579 | -0.36294 | -0.78810 |
| C | -2.27039 | -1.19645 | -0.86259 |
| C | -4.00216 | -2.62260 | -0.71203 |
| C | -2.78365 | -2.42829 | -1.63167 |
| H | -5.61761 | -0.96126 | -0.54896 |
| H | -3.55450 | 0.72690  | -0.70944 |
| H | -1.37114 | -0.68511 | -1.23396 |
| H | -4.70180 | -3.42998 | -0.96532 |
| H | -2.08903 | -3.28635 | -1.62816 |
| H | -3.06400 | -2.18158 | -2.66643 |
| C | -2.11033 | -1.80034 | 0.59474  |
| C | -3.28588 | -2.81324 | 0.66109  |
| C | -0.76393 | -2.44082 | 0.73737  |
| H | -0.62597 | -3.42804 | 0.23194  |
| O | 0.16824  | -1.94289 | 1.32450  |
| H | -2.18500 | -0.99727 | 1.34307  |
| H | -2.91573 | -3.84906 | 0.75843  |
| H | -3.95072 | -2.61453 | 1.51354  |
| H | 1.72594  | -0.74392 | 0.92511  |
| H | 0.02869  | 0.16373  | 1.25430  |
| N | 0.14670  | 0.92239  | 0.58340  |
| C | 1.41740  | 1.06984  | 0.07342  |
| N | 2.21007  | 0.02742  | 0.46755  |
| S | 1.90334  | 2.33914  | -0.88180 |
| C | 3.55717  | -0.26904 | 0.18076  |
| C | 4.55025  | 0.69093  | -0.05042 |
| C | 3.90742  | -1.62828 | 0.19296  |
| C | 5.86165  | 0.27874  | -0.28439 |
| C | 5.22101  | -2.02520 | -0.03209 |
| C | 6.20811  | -1.07138 | -0.28061 |
| H | 4.29484  | 1.74768  | -0.04554 |
| H | 3.13073  | -2.37545 | 0.38308  |
| H | 6.62725  | 1.03730  | -0.46548 |
| H | 5.47151  | -3.08875 | -0.01810 |
| H | 7.23999  | -1.37850 | -0.46443 |
| C | -0.98560 | 1.74615  | 0.45431  |
| C | -1.87017 | 1.78606  | 1.54329  |
| C | -1.30449 | 2.46210  | -0.70812 |
| C | -3.04624 | 2.52854  | 1.47996  |

|   |          |         |          |
|---|----------|---------|----------|
| C | -2.47650 | 3.21576 | -0.75388 |
| C | -3.35325 | 3.25706 | 0.33112  |
| H | -1.61700 | 1.23815 | 2.45613  |
| H | -0.63354 | 2.42846 | -1.56363 |
| H | -3.71808 | 2.54631 | 2.34144  |
| H | -2.70912 | 3.77430 | -1.66393 |
| H | -4.26801 | 3.85157 | 0.28102  |

**TS: endo\_CP + TUF-A**

*E* = -2741.331283

*H* = -2741.292980

*G* = -2741.410154

*N*<sub>imag</sub> = 1, -449.0877i cm<sup>-1</sup>

|   |          |          |          |
|---|----------|----------|----------|
| C | 0.62944  | 2.23628  | 0.54856  |
| C | 0.62719  | 3.12454  | 1.62829  |
| C | 0.41229  | 2.71716  | -0.79888 |
| O | 0.08097  | 2.04596  | -1.76879 |
| H | 0.55646  | 3.81788  | -0.92719 |
| C | 3.10101  | 2.17762  | 0.27424  |
| C | 3.27302  | 3.52486  | -0.01383 |
| C | 3.00030  | 4.27314  | 1.14524  |
| C | 2.58853  | 3.40491  | 2.16743  |
| C | 3.04330  | 2.02438  | 1.76241  |
| H | 0.58227  | 0.05184  | -1.78788 |
| H | 0.56593  | 1.15683  | 0.71907  |
| H | 0.34106  | 2.74229  | 2.61272  |
| H | 0.33766  | 4.16446  | 1.44997  |
| H | 3.28586  | 1.35684  | -0.42282 |
| H | 3.50119  | 3.93703  | -0.99807 |
| H | 2.99127  | 5.36339  | 1.20706  |
| H | 2.50399  | 3.71435  | 3.21206  |
| H | 2.45052  | 1.18270  | 2.14532  |
| H | 4.08498  | 1.89061  | 2.12287  |
| H | -1.22450 | 0.61323  | -1.35699 |
| N | -1.53842 | -0.25739 | -0.91728 |
| C | -0.52878 | -1.09367 | -0.52166 |
| N | 0.65194  | -0.71716 | -1.11860 |
| S | -0.67504 | -2.37445 | 0.52017  |
| C | -2.90100 | -0.28546 | -0.59382 |
| C | -3.62736 | -1.46126 | -0.36238 |
| C | -3.56661 | 0.94607  | -0.55416 |
| C | -4.98674 | -1.37851 | -0.07434 |
| C | -4.92967 | 1.00249  | -0.28236 |
| C | -5.65586 | -0.15712 | -0.02959 |
| H | -3.13515 | -2.43055 | -0.41073 |
| H | -3.00862 | 1.86953  | -0.73345 |
| H | -6.72307 | -0.11149 | 0.19268  |
| C | 1.96546  | -0.99876 | -0.72593 |
| C | 2.95970  | -0.92111 | -1.70619 |
| C | 2.33887  | -1.21504 | 0.60942  |
| C | 4.30479  | -1.01771 | -1.35385 |



|   |          |          |          |
|---|----------|----------|----------|
| C | 3.68535  | -1.30892 | 0.93737  |
| C | 4.68608  | -1.21085 | -0.03153 |
| H | 2.67707  | -0.76184 | -2.74990 |
| H | 1.57687  | -1.27463 | 1.38572  |
| H | 5.74094  | -1.27412 | 0.24269  |
| C | -5.74462 | -2.64508 | 0.23681  |
| F | -7.03201 | -2.53587 | -0.09599 |
| F | -5.24241 | -3.69212 | -0.41575 |
| F | -5.69840 | -2.93011 | 1.53899  |
| C | -5.62030 | 2.34126  | -0.30639 |
| F | -5.92331 | 2.71069  | -1.55244 |
| F | -6.75527 | 2.32383  | 0.38977  |
| F | -4.84248 | 3.29935  | 0.20414  |
| C | 5.34690  | -0.80374 | -2.42042 |
| F | 4.99253  | -1.36810 | -3.57361 |
| F | 5.51484  | 0.50170  | -2.65873 |
| F | 6.52986  | -1.29805 | -2.06488 |
| C | 4.09580  | -1.48553 | 2.37738  |
| F | 4.52972  | -2.71804 | 2.62412  |
| F | 5.09161  | -0.64807 | 2.69092  |
| F | 3.08759  | -1.23436 | 3.21398  |

**TS: exo\_CP + TUF-A**

**E** = -2741.333035

**H** = -2741.294756

**G** = -2741.412138

**N<sub>imag</sub>** = 1, -432.9042i cm<sup>-1</sup>

|   |          |          |          |
|---|----------|----------|----------|
| C | 4.12686  | 2.52319  | -1.98704 |
| C | 3.35552  | 1.38864  | -1.66505 |
| C | 2.01505  | 1.71365  | -1.79213 |
| C | 3.27433  | 3.60149  | -2.26071 |
| C | 1.91782  | 3.00474  | -2.54423 |
| H | 5.21492  | 2.58272  | -1.91898 |
| H | 3.74859  | 0.43460  | -1.30782 |
| H | 1.17740  | 1.03197  | -1.62171 |
| H | 3.61847  | 4.53148  | -2.72023 |
| H | 1.04817  | 3.63803  | -2.32226 |
| H | 1.88800  | 2.75873  | -3.62562 |
| C | 2.09206  | 3.18992  | 0.24380  |
| C | 2.80657  | 4.23052  | -0.35174 |
| C | 0.65337  | 3.21202  | 0.31423  |
| H | 0.15817  | 4.05114  | -0.23136 |
| O | -0.04881 | 2.40917  | 0.92024  |
| H | 2.61318  | 2.43608  | 0.83741  |
| H | 2.25229  | 5.11639  | -0.68475 |
| H | 3.82554  | 4.43259  | -0.01539 |
| H | -1.32892 | 0.94329  | 0.75471  |
| H | 0.51638  | 0.62171  | 1.11237  |
| N | 0.57749  | -0.34229 | 0.76531  |
| C | -0.62349 | -0.93456 | 0.44950  |
| N | -1.63414 | -0.01742 | 0.58094  |

|   |          |          |          |
|---|----------|----------|----------|
| S | -0.79933 | -2.51755 | -0.01090 |
| C | -3.01564 | -0.12389 | 0.38552  |
| C | -3.74919 | -1.31688 | 0.39937  |
| C | -3.70013 | 1.08957  | 0.20237  |
| C | -5.12979 | -1.27325 | 0.20591  |
| C | -5.07684 | 1.10723  | 0.02794  |
| C | -5.81248 | -0.07676 | 0.01749  |
| H | -3.25018 | -2.26957 | 0.56159  |
| H | -3.13973 | 2.02876  | 0.19572  |
| H | -6.89333 | -0.06412 | -0.13032 |
| C | 1.88813  | -0.80731 | 0.66122  |
| C | 2.83626  | -0.15692 | 1.46383  |
| C | 2.32847  | -1.79186 | -0.23857 |
| C | 4.19106  | -0.44482 | 1.34180  |
| C | 3.68663  | -2.08567 | -0.31733 |
| C | 4.63693  | -1.42326 | 0.46013  |
| H | 2.50427  | 0.59377  | 2.18676  |
| H | 1.61538  | -2.31334 | -0.87397 |
| H | 5.69831  | -1.66223 | 0.37454  |
| C | -5.78680 | 2.42961  | -0.10303 |
| F | -5.00539 | 3.35277  | -0.66889 |
| F | -6.89049 | 2.32232  | -0.84152 |
| F | -6.15377 | 2.90594  | 1.08822  |
| C | -5.88346 | -2.57933 | 0.16116  |
| F | -5.41060 | -3.44764 | 1.05422  |
| F | -7.18229 | -2.40566 | 0.40999  |
| F | -5.78391 | -3.15445 | -1.03826 |
| C | 4.16896  | -3.06139 | -1.36100 |
| F | 5.21527  | -3.76388 | -0.92714 |
| F | 3.22038  | -3.91674 | -1.72638 |
| F | 4.56516  | -2.41003 | -2.46130 |
| C | 5.16812  | 0.39383  | 2.12077  |
| F | 6.38238  | -0.14645 | 2.15155  |
| F | 5.28643  | 1.60916  | 1.56239  |
| F | 4.76787  | 0.58605  | 3.37629  |

**PC: endo\_CP + TUF-A**

**E** = -2741.386038

**H** = -2741.348555

**G** = -2741.463184

**N<sub>imag</sub>** = 0

|   |          |         |          |
|---|----------|---------|----------|
| C | -2.04398 | 2.60318 | -0.75085 |
| C | -2.26364 | 3.10670 | -2.20789 |
| C | -0.78392 | 3.10526 | -0.12198 |
| O | 0.00375  | 2.41304 | 0.48560  |
| H | -0.58500 | 4.19775 | -0.22560 |
| C | -3.34362 | 3.11944 | -0.01603 |
| C | -3.31195 | 4.63782 | -0.04631 |
| C | -3.52089 | 5.01561 | -1.31439 |
| C | -3.68078 | 3.75620 | -2.14501 |
| C | -4.37245 | 2.83386 | -1.12503 |

|   |          |          |          |
|---|----------|----------|----------|
| H | -0.49947 | 0.50117  | 0.67113  |
| H | -2.03003 | 1.50281  | -0.71528 |
| H | -2.23957 | 2.25913  | -2.90946 |
| H | -1.49728 | 3.83009  | -2.53112 |
| H | -3.51444 | 2.65296  | 0.96352  |
| H | -3.07328 | 5.27990  | 0.80431  |
| H | -3.48205 | 6.03124  | -1.71420 |
| H | -4.15895 | 3.87577  | -3.12584 |
| H | -4.40029 | 1.77386  | -1.42947 |
| H | -5.38161 | 3.17248  | -0.84743 |
| H | 1.33803  | 0.84459  | 0.48318  |
| N | 1.68952  | -0.10338 | 0.35092  |
| C | 0.72079  | -1.07078 | 0.25541  |
| N | -0.51510 | -0.49460 | 0.44133  |
| S | 0.97564  | -2.68354 | -0.01802 |
| C | 3.08355  | -0.13822 | 0.23020  |
| C | 3.87683  | -1.29169 | 0.15047  |
| C | 3.71321  | 1.11683  | 0.19985  |
| C | 5.25959  | -1.16192 | 0.03543  |
| C | 5.09329  | 1.21811  | 0.08979  |
| C | 5.88855  | 0.07886  | -0.00177 |
| H | 3.41904  | -2.27790 | 0.16826  |
| H | 3.10819  | 2.02716  | 0.25358  |
| H | 6.97167  | 0.15814  | -0.10766 |
| C | -1.80560 | -1.03070 | 0.42117  |
| C | -2.78166 | -0.28925 | 1.10792  |
| C | -2.19784 | -2.18271 | -0.27280 |
| C | -4.11486 | -0.67313 | 1.08264  |
| C | -3.54045 | -2.55963 | -0.26619 |
| C | -4.51297 | -1.82301 | 0.40306  |
| H | -2.48371 | 0.59464  | 1.67847  |
| H | -1.46210 | -2.77786 | -0.80987 |
| H | -5.55723 | -2.14227 | 0.40217  |
| C | 5.72464  | 2.58573  | 0.11529  |
| F | 6.92544  | 2.58620  | -0.45908 |
| F | 4.96729  | 3.48439  | -0.51866 |
| F | 5.88182  | 3.02299  | 1.36662  |
| C | 6.10613  | -2.41077 | 0.00507  |
| F | 5.44742  | -3.44503 | -0.51190 |
| F | 7.21339  | -2.22873 | -0.71627 |
| F | 6.49217  | -2.76081 | 1.23427  |
| C | -5.15287 | 0.17908  | 1.76376  |
| F | -6.05048 | -0.55818 | 2.41031  |
| F | -4.60412 | 1.02313  | 2.64261  |
| F | -5.82250 | 0.92403  | 0.87555  |
| C | -3.96286 | -3.76311 | -1.07329 |
| F | -5.02137 | -4.36493 | -0.52955 |
| F | -4.30828 | -3.40747 | -2.31392 |
| F | -2.98638 | -4.65960 | -1.17575 |

**PC: exo\_CP + TUF-A**

**E** = -2741.388007

**H** = -2741.350284

**G** = -2741.467823

**N<sub>imag</sub>** = 0

|   |          |          |          |
|---|----------|----------|----------|
| C | 4.47262  | 2.54562  | -1.57662 |
| C | 3.60630  | 1.52768  | -1.49005 |
| C | 2.21425  | 2.12717  | -1.43676 |
| C | 3.66995  | 3.83361  | -1.58368 |
| C | 2.40537  | 3.36790  | -2.32939 |
| H | 5.56226  | 2.48515  | -1.54992 |
| H | 3.83251  | 0.46361  | -1.39129 |
| H | 1.37951  | 1.44741  | -1.66066 |
| H | 4.18228  | 4.72470  | -1.96888 |
| H | 1.57455  | 4.09345  | -2.27993 |
| H | 2.60148  | 3.09709  | -3.37728 |
| C | 2.11841  | 2.81103  | -0.00615 |
| C | 3.09724  | 4.00544  | -0.14291 |
| C | 0.69595  | 3.19707  | 0.25715  |
| H | 0.33508  | 4.14659  | -0.20640 |
| O | -0.08189 | 2.52029  | 0.89267  |
| H | 2.42904  | 2.09693  | 0.76853  |
| H | 2.56851  | 4.97037  | -0.05273 |
| H | 3.88152  | 3.97597  | 0.62667  |
| H | -1.37686 | 0.96798  | 0.81882  |
| H | 0.49149  | 0.59230  | 1.14915  |
| N | 0.53400  | -0.33438 | 0.72121  |
| C | -0.67882 | -0.89045 | 0.38461  |
| N | -1.68253 | 0.01875  | 0.60367  |
| S | -0.87889 | -2.43005 | -0.19163 |
| C | -3.06616 | -0.08011 | 0.40096  |
| C | -3.79832 | -1.27228 | 0.45450  |
| C | -3.74811 | 1.12764  | 0.18922  |
| C | -5.17988 | -1.23460 | 0.27139  |
| C | -5.12651 | 1.14068  | 0.01954  |
| C | -5.86226 | -0.04204 | 0.05396  |
| H | -3.29777 | -2.21863 | 0.64764  |
| H | -3.18937 | 2.06759  | 0.16664  |
| H | -6.94626 | -0.03095 | -0.06911 |
| C | 1.83501  | -0.82938 | 0.58770  |
| C | 2.79074  | -0.31424 | 1.47174  |
| C | 2.25179  | -1.72225 | -0.41273 |
| C | 4.13695  | -0.63894 | 1.33529  |
| C | 3.59729  | -2.06374 | -0.50313 |
| C | 4.55848  | -1.53009 | 0.35684  |
| H | 2.47701  | 0.35953  | 2.27454  |
| H | 1.53051  | -2.13731 | -1.11398 |
| H | 5.61155  | -1.79846 | 0.25756  |
| C | -5.82040 | 2.44898  | -0.25906 |
| F | -7.08240 | 2.43552  | 0.16599  |
| F | -5.19867 | 3.46910  | 0.33641  |

|   |          |          |          |
|---|----------|----------|----------|
| F | -5.84600 | 2.71718  | -1.56632 |
| C | -5.93787 | -2.53911 | 0.28880  |
| F | -5.45261 | -3.37294 | 1.20807  |
| F | -7.23160 | -2.35090 | 0.55169  |
| F | -5.85863 | -3.16065 | -0.88816 |
| C | 4.06079  | -2.93872 | -1.64053 |
| F | 5.06328  | -3.73342 | -1.26770 |
| F | 3.08333  | -3.70254 | -2.11677 |
| F | 4.51187  | -2.18900 | -2.65335 |
| C | 5.12306  | 0.05724  | 2.23496  |
| F | 6.34429  | -0.45772 | 2.13482  |
| F | 5.20644  | 1.35743  | 1.92140  |
| F | 4.75122  | -0.00543 | 3.51362  |
